# Supplementary material for: Chemical studies on the parasitic plant Thonningia sanguinea Vahl
Source: Royal Society of Chemistry journal article supplement (doi:10.1039/c8ra03913e), 2018-01-01

## SUPPLEMENTARY MATERIAL

### Chemical studies on the parasitic plant *Thonningia sanguinea* Vahl†

Ama Kyeraa Thomford<sup>ab</sup>, Reda Foud Ahmed Abdelhameed,<sup>ac</sup> and Koji Yamada<sup>\*a</sup>

<sup>a</sup>Graduate School of Biomedical Sciences, Nagasaki University, Bunkyo-machi 1-14, Nagasaki 852-8521, Japan.

<sup>b</sup>Department of Biomedical Sciences, School of Allied Health Sciences, University of Cape Coast, Ghana.

<sup>c</sup>Department of Pharmacognosy, Faculty of Pharmacy, Suez Canal University, 41522 Ismailia, Egypt.

\*corresponding author

Email: [kyamada@nagasaki-u-ac.jp](mailto:kyamada@nagasaki-u-ac.jp)

## LIST OF FIGURES

Page No.

|                                                                                                                                                     |    |
|-----------------------------------------------------------------------------------------------------------------------------------------------------|----|
| Figure S1a. <sup>1</sup> H NMR spectrum of <b>1</b> (Chloroform- <i>d</i> , 300 MHz) β-Sitosteryl-3β-D-glucopyranoside-6- <i>O</i> -palmitate.....  | 3  |
| Figure S1b. <sup>13</sup> C NMR spectrum of <b>1</b> (Chloroform- <i>d</i> , 100 MHz) β-Sitosteryl-3β-D-glucopyranoside-6- <i>O</i> -palmitate..... | 3  |
| Figure S2a. <sup>1</sup> H NMR spectrum of <b>2</b> (Pyridine- <i>d</i> <sub>5</sub> , 300 MHz) β-Sitosterol.....                                   | 4  |
| Figure S2b. <sup>13</sup> C NMR spectrum of <b>2</b> (Pyridine- <i>d</i> <sub>5</sub> , 100 MHz) β-Sitosterol.....                                  | 4  |
| Figure S3a. <sup>1</sup> H NMR spectrum of <b>3</b> (Pyridine- <i>d</i> <sub>5</sub> , 300 MHz) β-Sitosterol-3β-D-glucopyranoside..                 | 5  |
| Figure S3b. <sup>13</sup> C NMR spectrum of <b>3</b> (Pyridine- <i>d</i> <sub>5</sub> , 100 MHz) β-Sitosterol-3β-D-glucopyranoside                  | 5  |
| Figure S4a. <sup>1</sup> H NMR spectrum of <b>4</b> (Pyridine- <i>d</i> <sub>5</sub> , 300 MHz) β-Stigmasterol.....                                 | 6  |
| Figure S4b. <sup>13</sup> C NMR spectrum of <b>4</b> (Pyridine- <i>d</i> <sub>5</sub> , 100 MHz) β-Stigmasterol.....                                | 6  |
| Figure S5a. <sup>1</sup> H NMR spectrum of <b>5</b> (Pyridine- <i>d</i> <sub>5</sub> , 300 MHz) β-Stigmasterol-3β-D-glucopyranoside.....            | 7  |
| Figure S5b. <sup>13</sup> C NMR spectrum of <b>5</b> (Pyridine- <i>d</i> <sub>5</sub> , 100 MHz) β-Stigmasterol-3β-D-glucopyranoside.....           | 7  |
| Figure S6. <sup>1</sup> H NMR spectrum of <b>6</b> (Chloroform- <i>d</i> , 300 MHz) Phytocholesterol.....                                           | 8  |
| Figure S7a. <sup>1</sup> H NMR spectrum of <b>7</b> (Pyridine- <i>d</i> <sub>5</sub> , 400 MHz) Betulinic acid.....                                 | 9  |
| Figure S7b. <sup>13</sup> C NMR spectrum of <b>7</b> (Pyridine- <i>d</i> <sub>5</sub> , 100 MHz) Betulinic acid.....                                | 9  |
| Figure S8a. <sup>1</sup> H NMR spectrum of <b>8</b> (Chloroform- <i>d</i> , 400 MHz) (+)-Epipinoresinol.....                                        | 10 |
| Figure S8b. <sup>13</sup> C NMR spectrum of <b>8</b> (Chloroform- <i>d</i> , 100 MHz) (+)-Epipinoresinol.....                                       | 10 |
| Figure S9a. <sup>1</sup> H NMR spectrum of <b>9</b> (Chloroform- <i>d</i> , 400 MHz) (+)-Pinoresinol.....                                           | 11 |
| Figure S9b. <sup>13</sup> C NMR spectrum of <b>9</b> (Chloroform- <i>d</i> , 100 MHz) (+)-Pinoresinol.....                                          | 11 |
| Figure S10a. <sup>1</sup> H NMR spectrum of <b>10</b> (Methanol- <i>d</i> <sub>4</sub> , 400 MHz) (+)-Cyclooolivil.....                             | 12 |
| Figure S10b. <sup>13</sup> C NMR spectrum of <b>10</b> (Methanol- <i>d</i> <sub>4</sub> , 100 MHz) (+)-Cyclooolivil.....                            | 12 |
| Figure S11a. <sup>1</sup> H NMR spectrum of <b>11</b> (Methanol- <i>d</i> <sub>4</sub> , 400 MHz) (+)-Secoisolariciresinol.....                     | 13 |
| Figure S11b. <sup>13</sup> C NMR spectrum of <b>11</b> (Methanol- <i>d</i> <sub>4</sub> , 100 MHz) (+)-Secoisolariciresinol.....                    | 13 |
| Figure S12a. <sup>1</sup> H NMR spectrum of <b>12</b> (Methanol- <i>d</i> <sub>4</sub> , 400 MHz) (+)-Isolariciresinol.....                         | 14 |
| Figure S12b. <sup>13</sup> C NMR spectrum of <b>12</b> (Methanol- <i>d</i> <sub>4</sub> , 100 MHz) (+)-Isolariciresinol.....                        | 14 |
| Figure S13a. <sup>1</sup> H NMR spectrum of <b>13</b> (Methanol- <i>d</i> <sub>4</sub> , 400 MHz) (+)-Eriodicyol.....                               | 15 |
| Figure S13b. <sup>13</sup> C NMR spectrum of <b>13</b> (Methanol- <i>d</i> <sub>4</sub> , 100 MHz) (+)-Eriodictyol.....                             | 15 |
| Figure S14a. <sup>1</sup> H NMR spectrum of <b>TSS-1</b> (Chloroform- <i>d</i> , 300 MHz).....                                                      | 16 |
| Figure S14b. <sup>13</sup> C NMR spectrum of <b>TSS-1</b> (Chloroform- <i>d</i> , 100 MHz).....                                                     | 16 |
| Figure S15a. <sup>1</sup> H NMR spectrum of <b>TSC-1</b> (Pyridine- <i>d</i> <sub>5</sub> , 300 MHz).....                                           | 17 |
| Figure S15b. <sup>13</sup> C NMR spectrum of <b>TSC-1</b> (Chloroform- <i>d</i> , 100 MHz).....                                                     | 17 |
| Figure S16a. <sup>1</sup> H NMR spectrum of <b>TSC-2</b> (Pyridine- <i>d</i> <sub>5</sub> , 300 MHz).....                                           | 18 |
| Figure S16b. <sup>13</sup> C NMR spectrum of <b>TSC-2</b> (Pyridine- <i>d</i> <sub>5</sub> , 100 MHz).....                                          | 18 |
| Figure S17. <sup>1</sup> H NMR spectrum of <b>TSC-1-FAME</b> (Chloroform- <i>d</i> , 300 MHz) .....                                                 | 19 |
| Figure S18. <sup>1</sup> H NMR spectrum of <b>TSC-2-FAME</b> (Chloroform- <i>d</i> , 300 MHz) .....                                                 | 19 |
| Figure S19. <sup>1</sup> H NMR spectrum of <b>TSC-1-FAME</b> (Chloroform- <i>d</i> + D <sub>2</sub> O, 300 MHz).....                                | 20 |
| Figure S 20. FAB MASS data of <b>TSS-1</b> .....                                                                                                    | 20 |

|                                                       |    |
|-------------------------------------------------------|----|
| Figure S21. FAB MASS data of <b>TSC-1</b> .....       | 21 |
| Figure S22. FAB MASS data of <b>TSC-2</b> .....       | 21 |
| Figure S23. FAB MASS data of <b>TSC-1-FAME</b> .....  | 22 |
| Figure S24. FAB MASS data of <b>TSC-2-FAME</b> .....  | 22 |
| Figure S25. FAB MASS data of <b>TSC-1-LCB-1</b> ..... | 23 |
| Figure S26. FAB MASS data of <b>TSC-1-LCB-2</b> ..... | 23 |
| Figure S25. FAB MASS data of <b>TSC-2-LCB-1</b> ..... | 24 |
| Figure S26. FAB MASS data of <b>TSC-2-LCB-2</b> ..... | 25 |

Figure S 1a.  $^1\text{H}$  NMR spectrum of **1** (Chloroform-*d*, 300 MHz)  $\beta$ -Sitosteryl-3 $\beta$ -D-glucopyranoside-6-*O*-palmitate

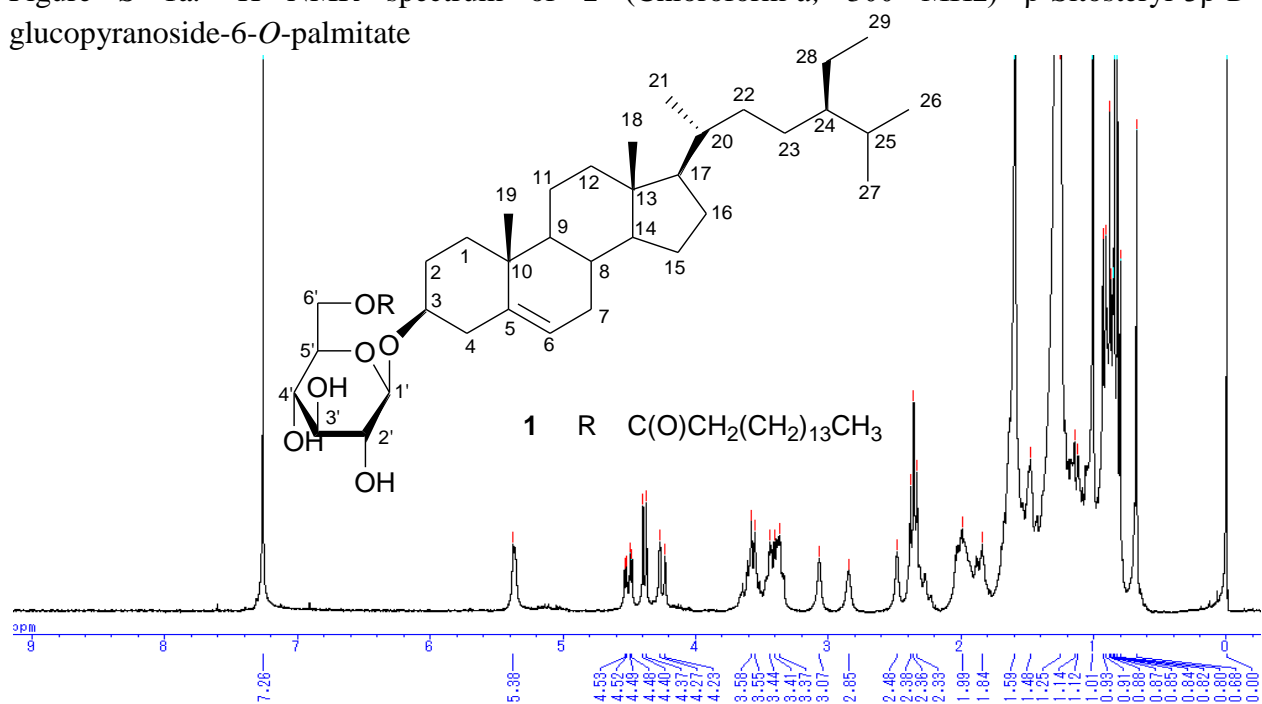

Figure S 1a.  $^{13}\text{C}$  NMR spectrum of **1** (Chloroform-*d*, 100 MHz)  $\beta$ -Sitosteryl-3 $\beta$ -D-glucopyranoside-6-*O*-palmitate

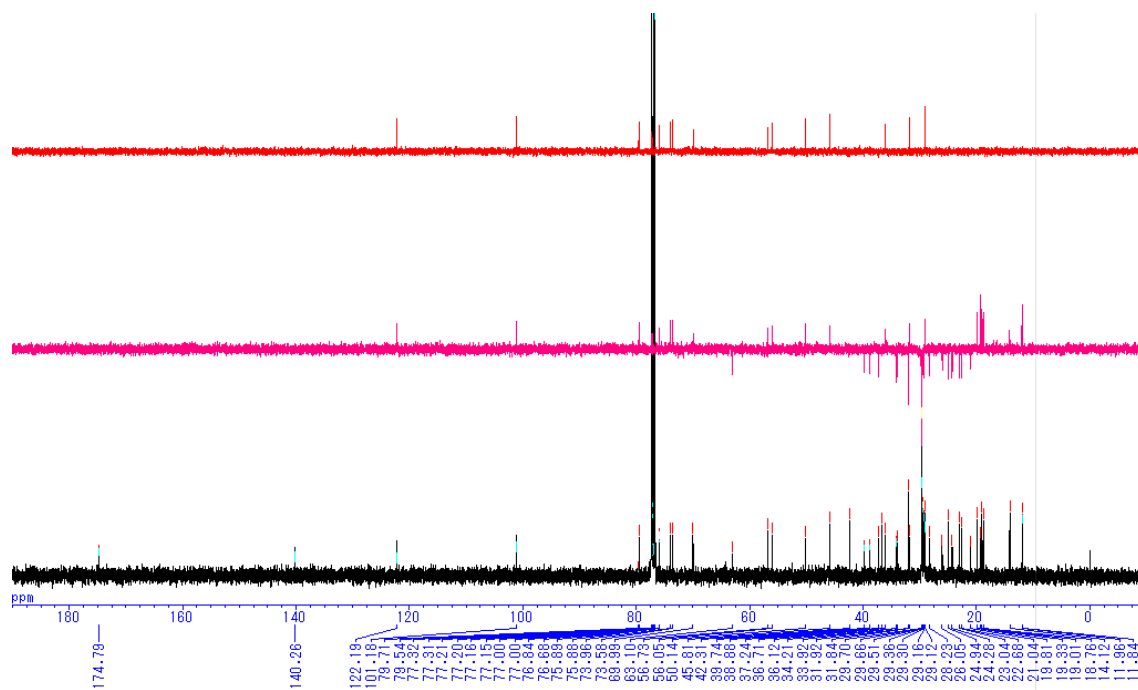

Figure S 2a.  $^1\text{H}$  NMR spectrum of **2** (Pyridine- $d_5$ , 300 MHz)  $\beta$ -Sitosterol

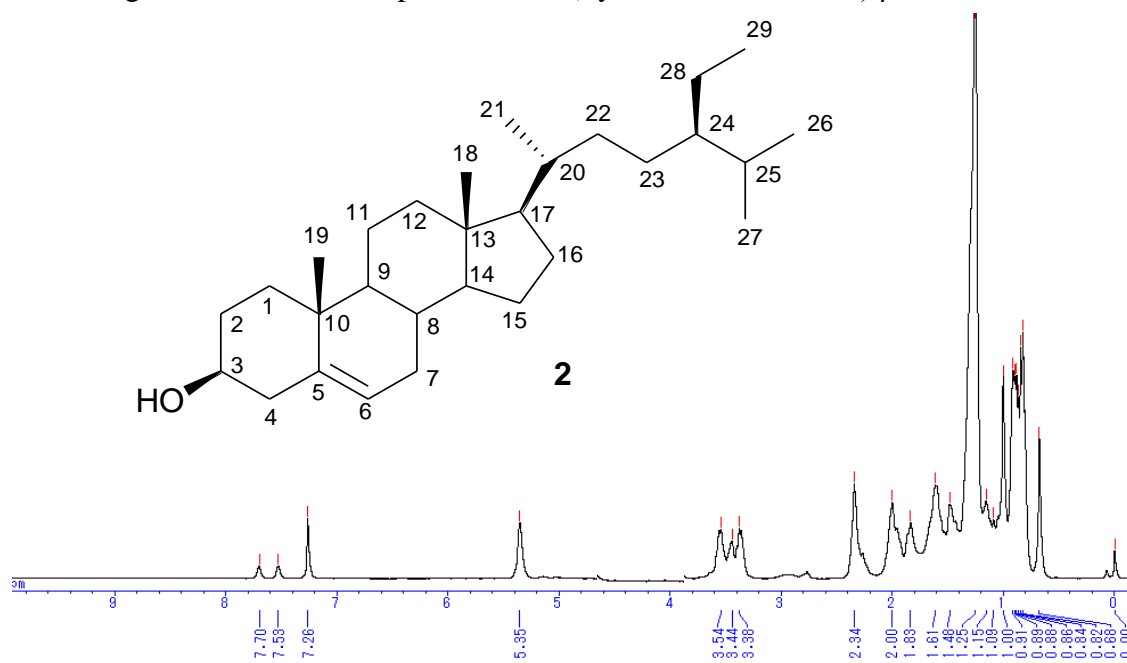

Figure S 2b.  $^{13}\text{C}$  NMR spectrum of **2** (Pyridine- $d_5$ , 100 MHz)  $\beta$ -Sitosterol

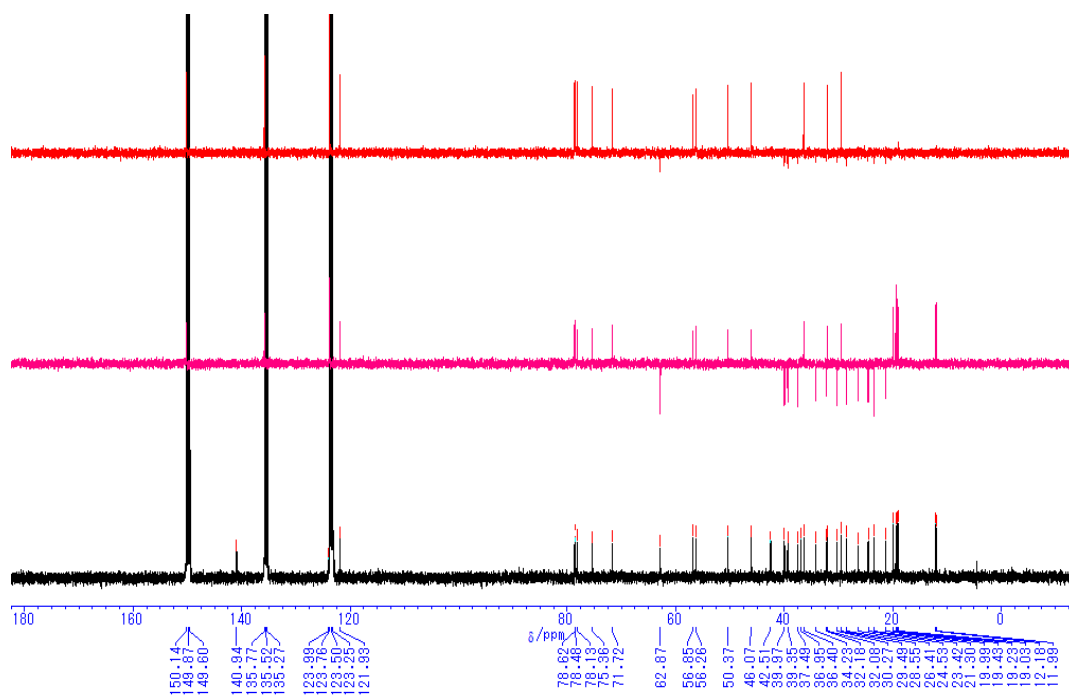

Figure S 3a.  $^1\text{H}$  NMR spectrum of **3** (Pyridine- $d_5$ , 300 MHz)  $\beta$ -Sitosterol-3 $\beta$ -D-glucopyranoside

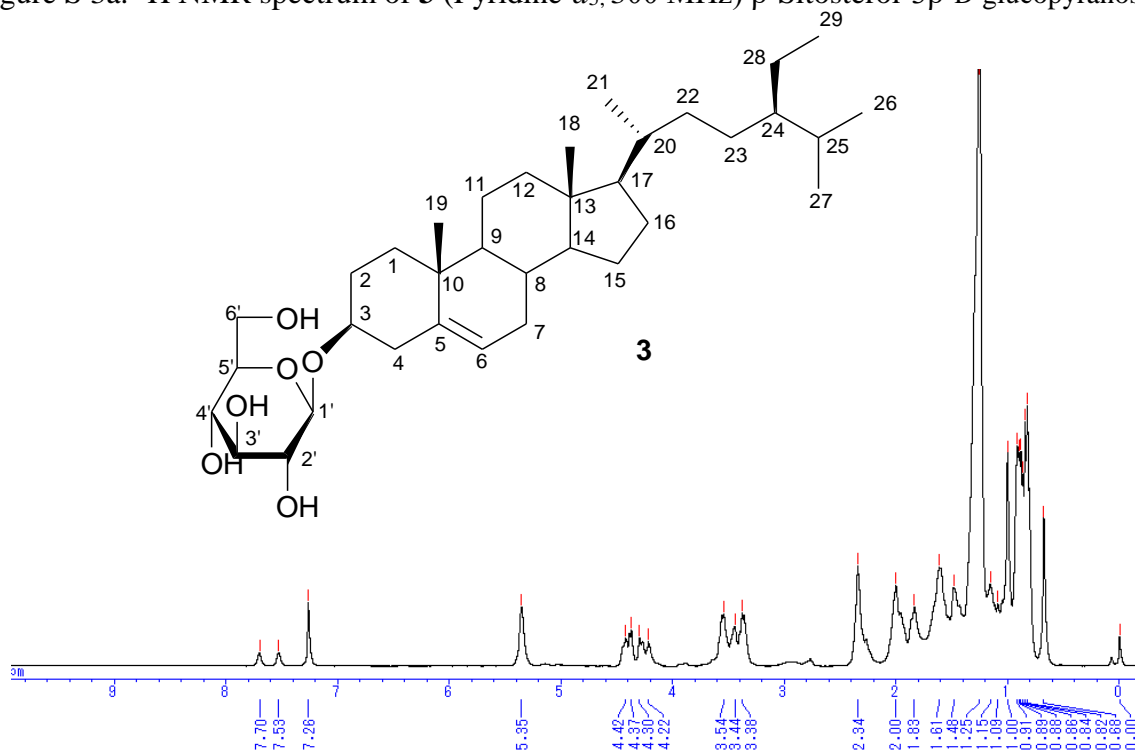

Figure S 3b.  $^{13}\text{C}$  NMR spectrum of **3** (Pyridine- $d_5$ , 100 MHz)  $\beta$ -Sitosterol-3 $\beta$ -D-glucopyranoside

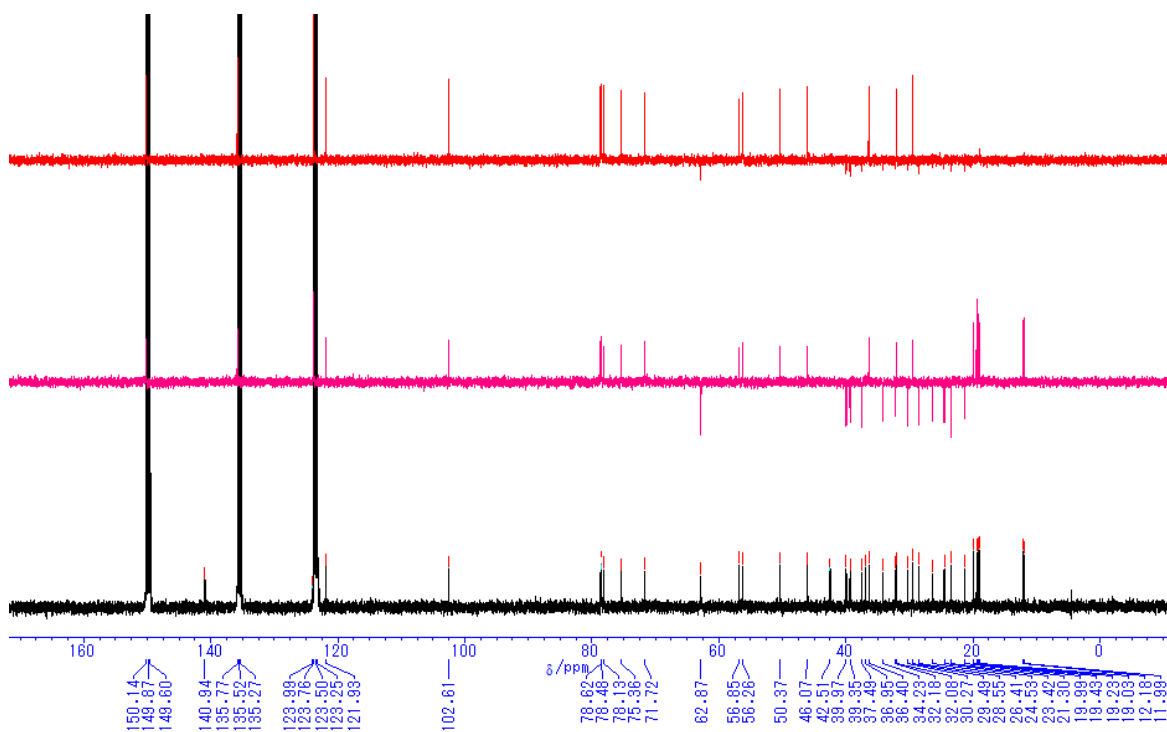

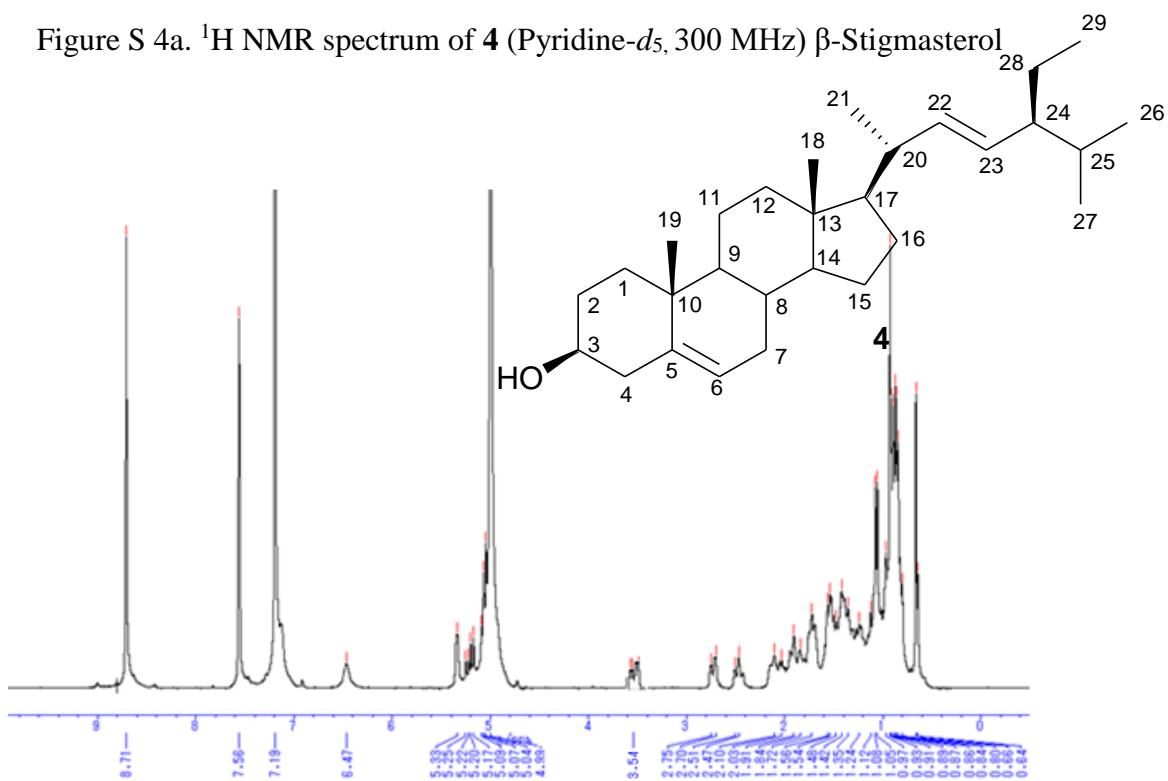

Figure S 4b.  $^{13}\text{C}$  NMR spectrum of **4** (Pyridine- $d_5$ , 100 MHz)  $\beta$ -Stigmasterol

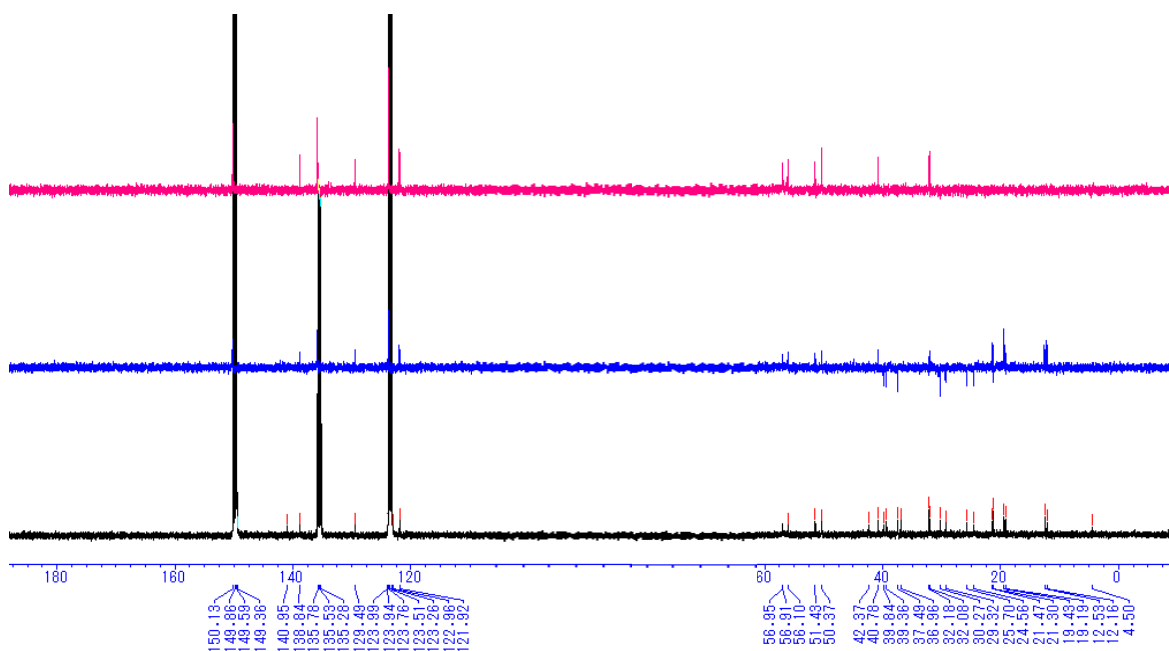

Figure S 5a.  $^1\text{H}$  NMR spectrum of **5** (Pyridine- $d_5$ , 300 MHz)  $\beta$ -Stigmasterol-3 $\beta$ -D-glucopyranoside

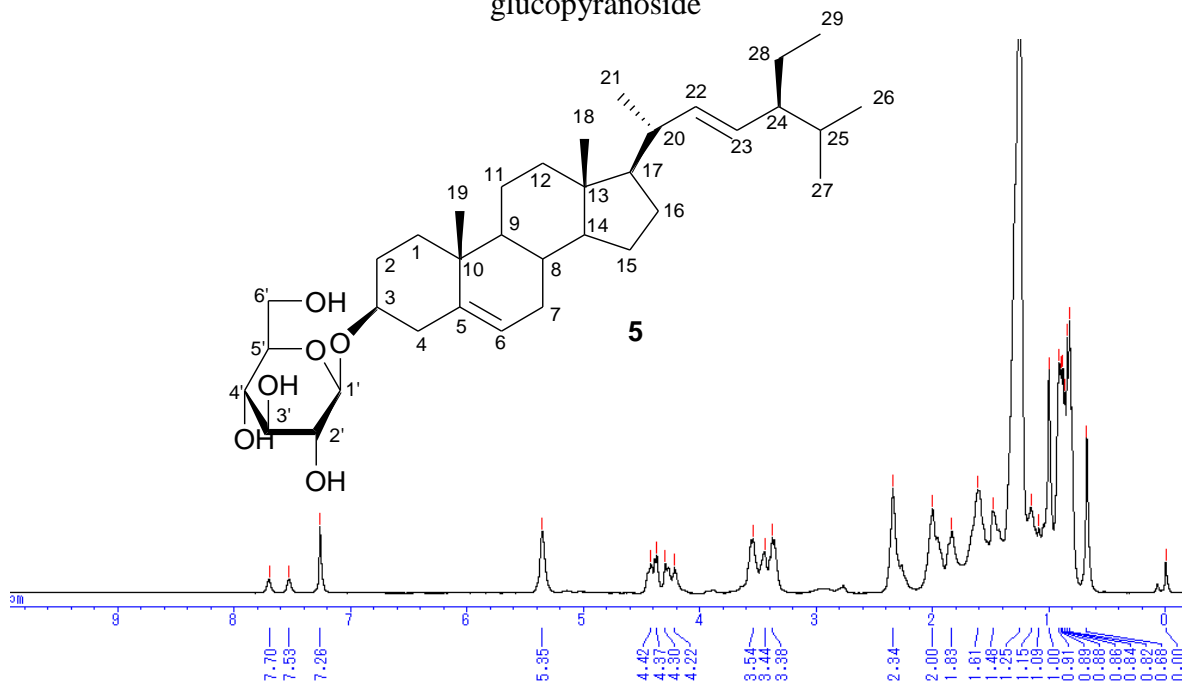

Figure S 5b.  $^{13}\text{C}$  NMR spectrum of **5** (Pyridine- $d_5$ , 100 MHz)  $\beta$ -Stigmasterol-3 $\beta$ -D-glucopyranoside

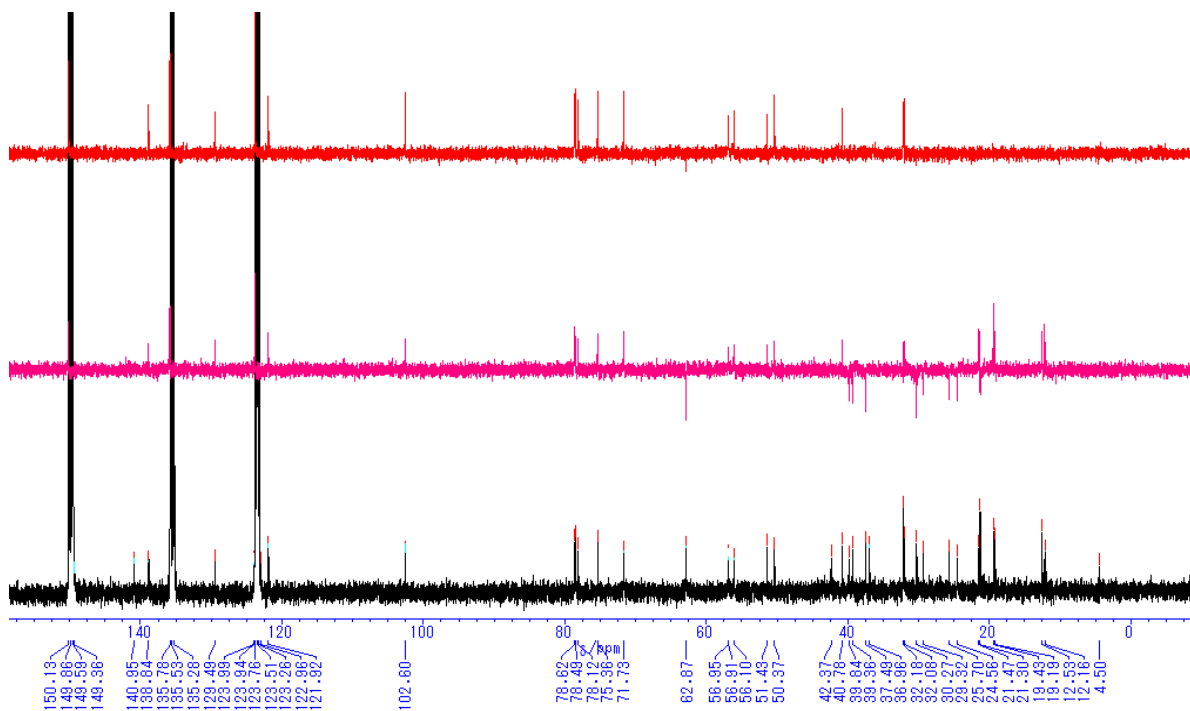



Figure S 6.  $^1\text{H}$  NMR spectrum of **6** (Chloroform-*d*, 300 MHz) Phytocholesterol

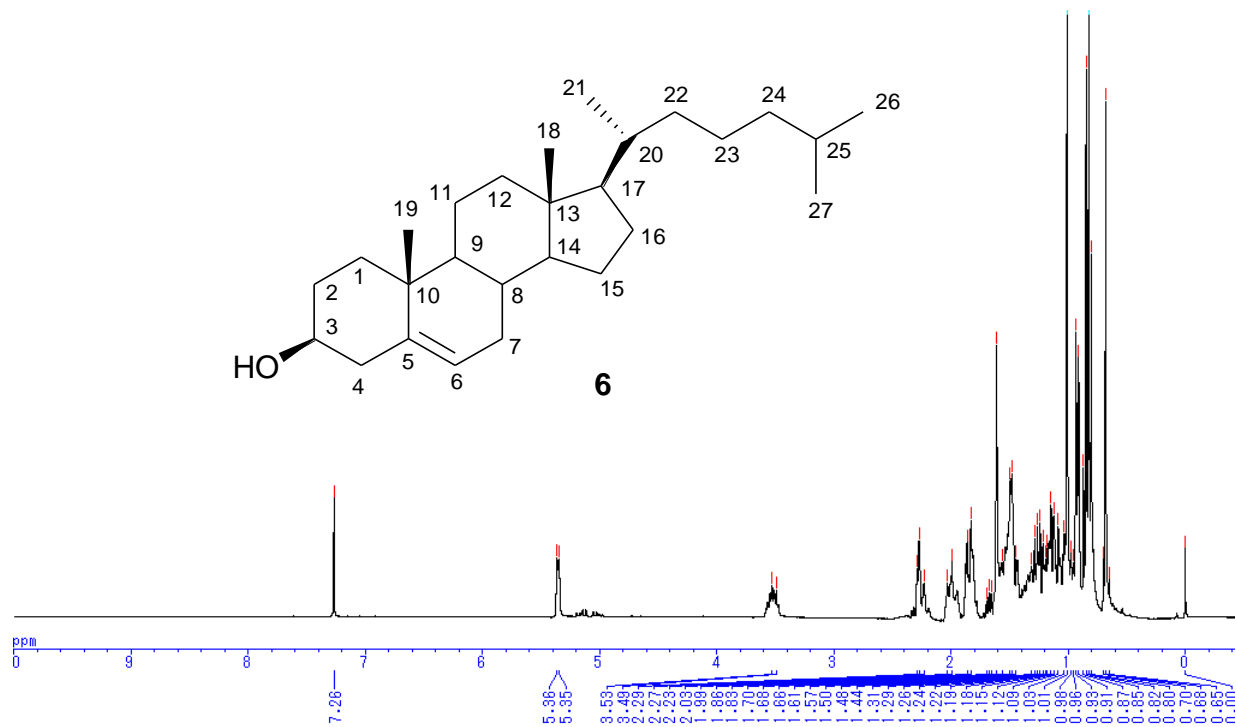

Figure S 7a.  $^1\text{H}$  NMR spectrum of **7** (Pyridine- $d_5$ , 400 MHz) Betulinic acid

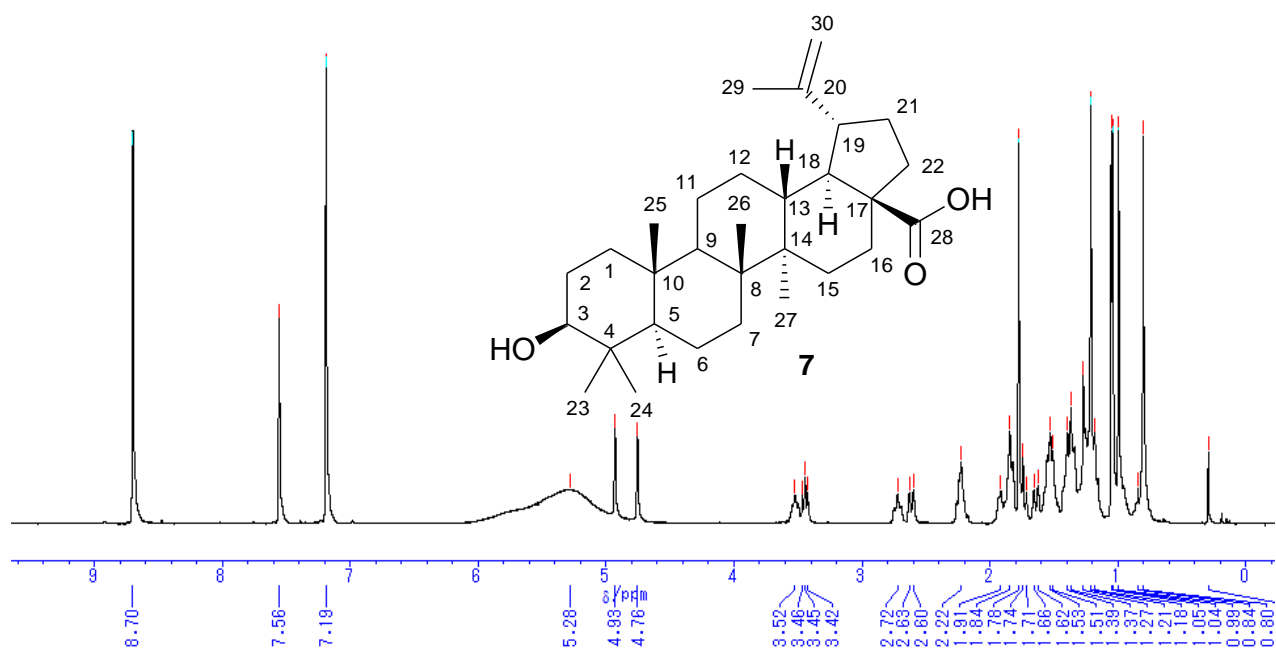

Figure S 7b.  $^{13}\text{C}$  NMR spectrum of **7** (Pyridine- $d_5$ , 100 MHz) Betulinic acid

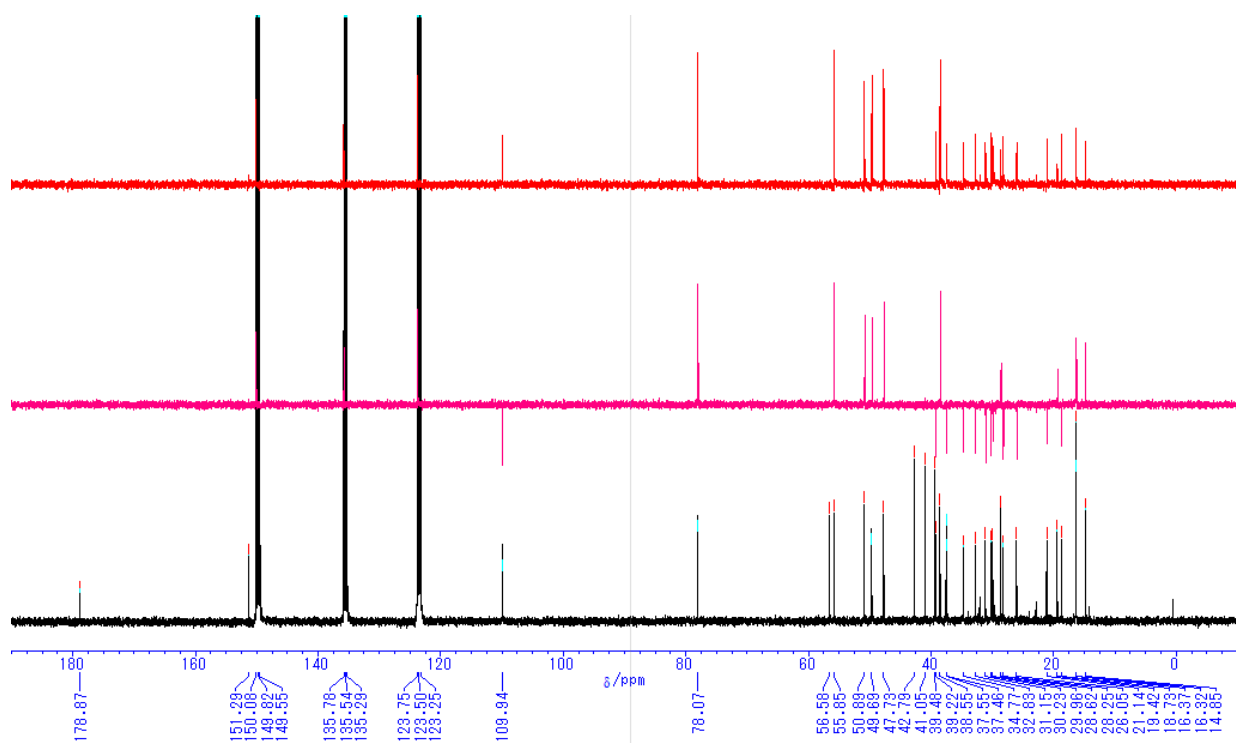

Figure S 8a.  $^1\text{H}$  NMR spectrum of **8** (Chloroform-*d*, 400 MHz) (+)-Epipinoresinol

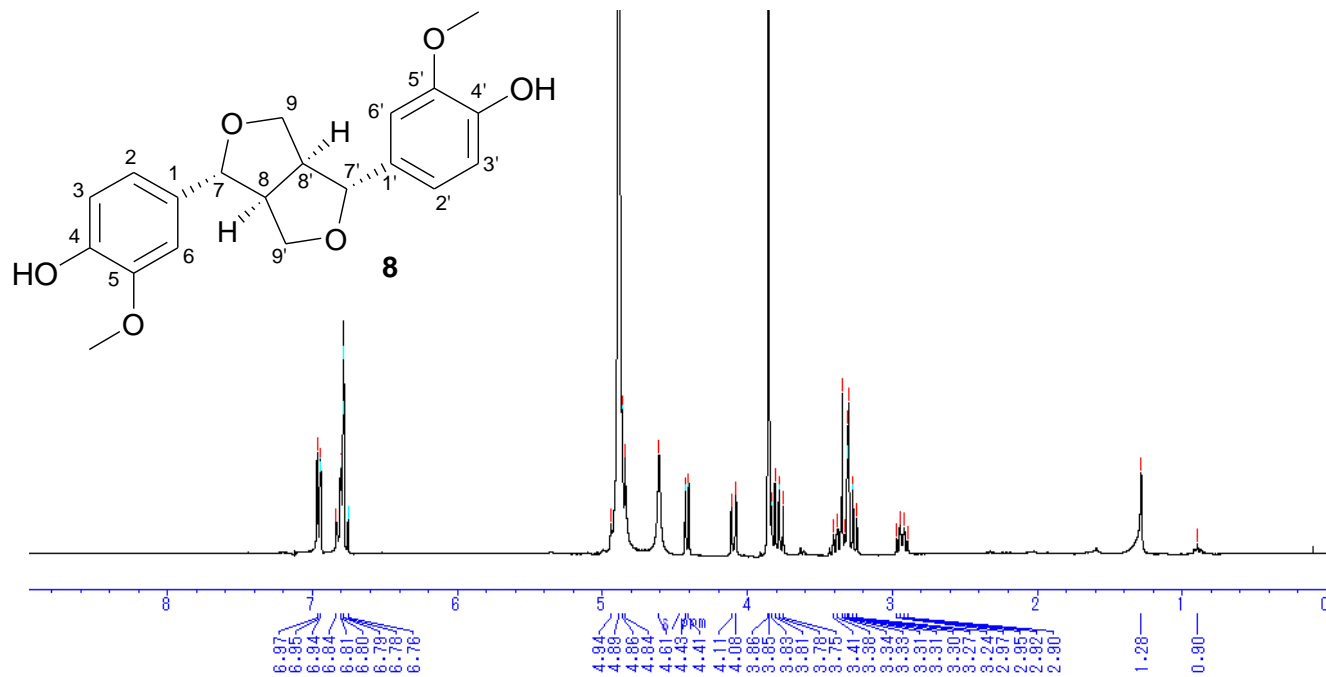

Figure S 8b.  $^{13}\text{C}$  NMR spectrum of **8** (Chloroform-*d*, 100 MHz) (+)-Epipinoresinol

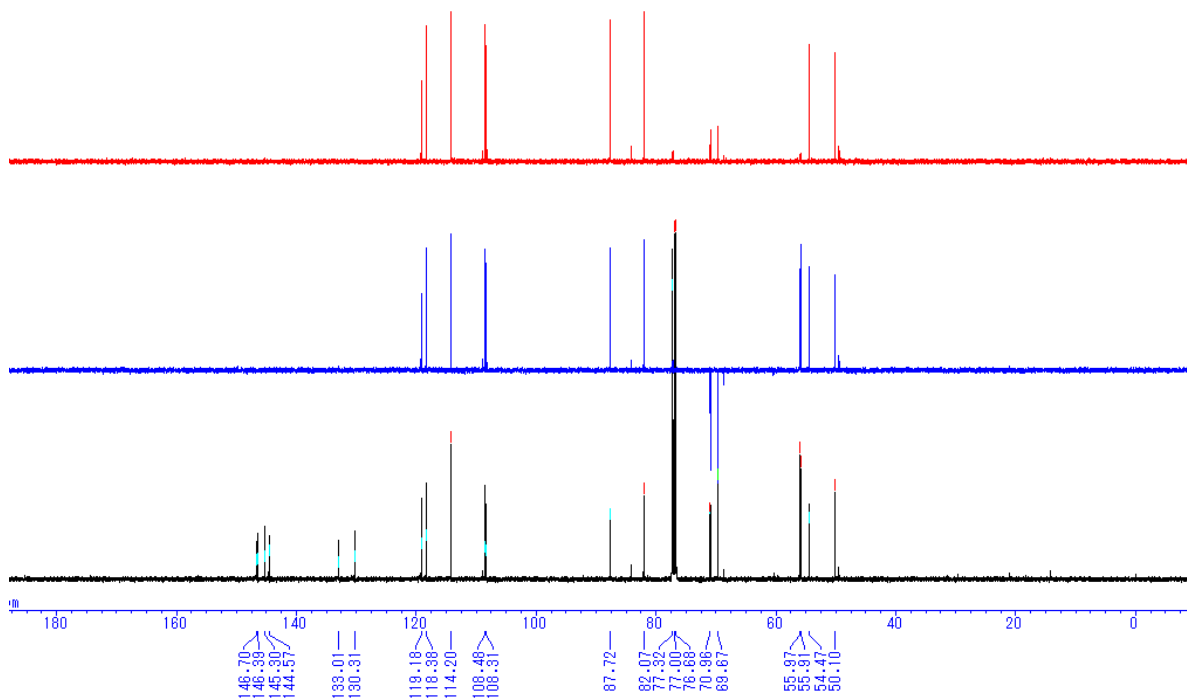

Figure S 9a.  $^1\text{H}$  NMR spectrum of **9** (Chloroform- $d$ , 400 MHz) (+)-Pinoresinol

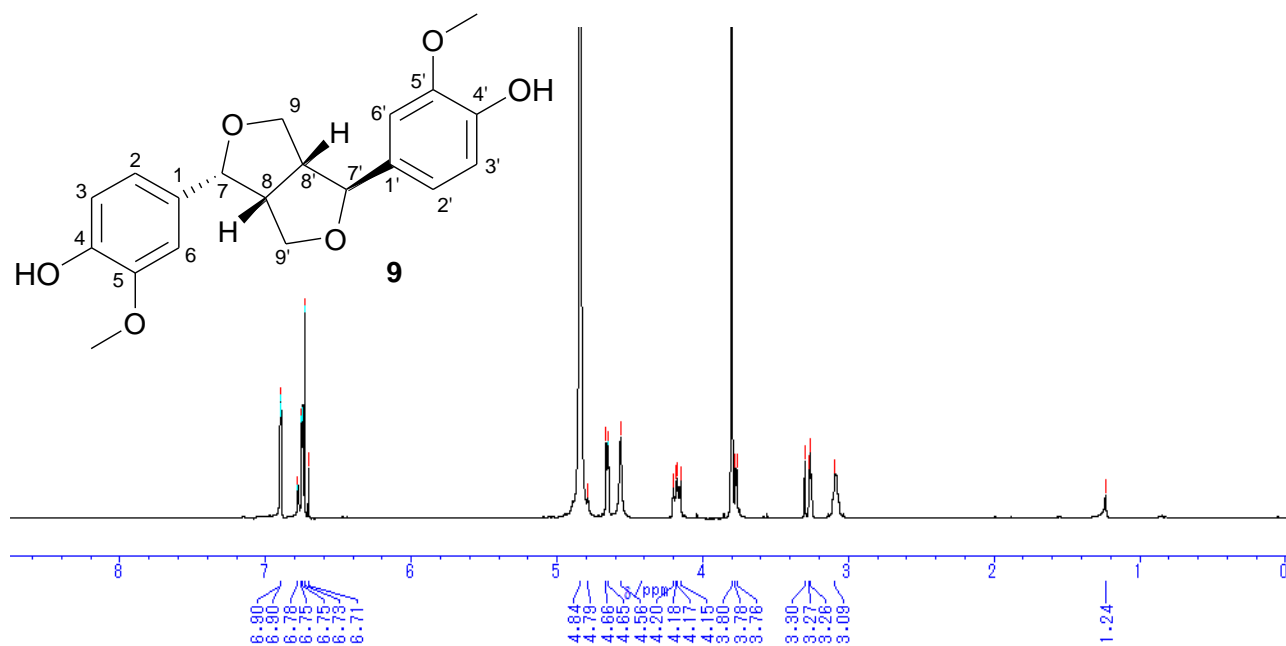

Figure S 9b.  $^{13}\text{C}$  NMR spectrum of **9** (Chloroform- $d$ , 100 MHz) (+)-Pinoresinol

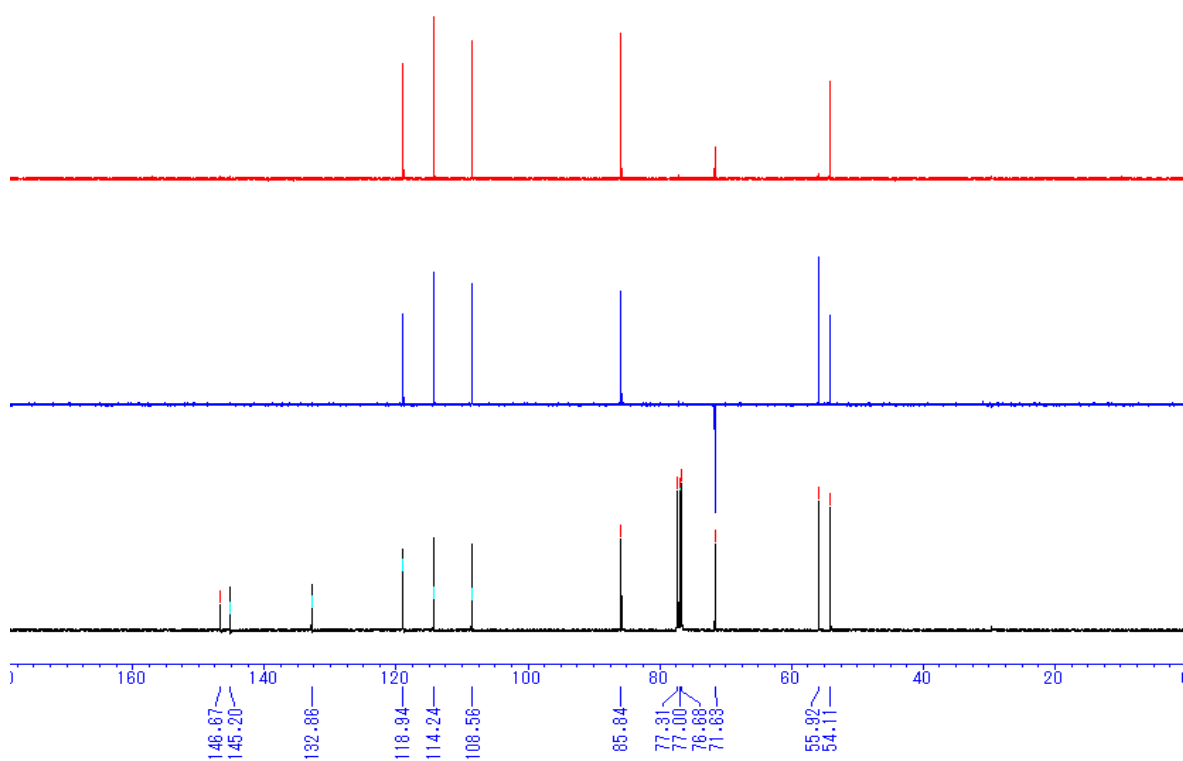

Figure S 10a.  $^1\text{H}$  NMR spectrum of **10** (Methanol- $d_4$ , 400 MHz) (+)-Cyclooolivil

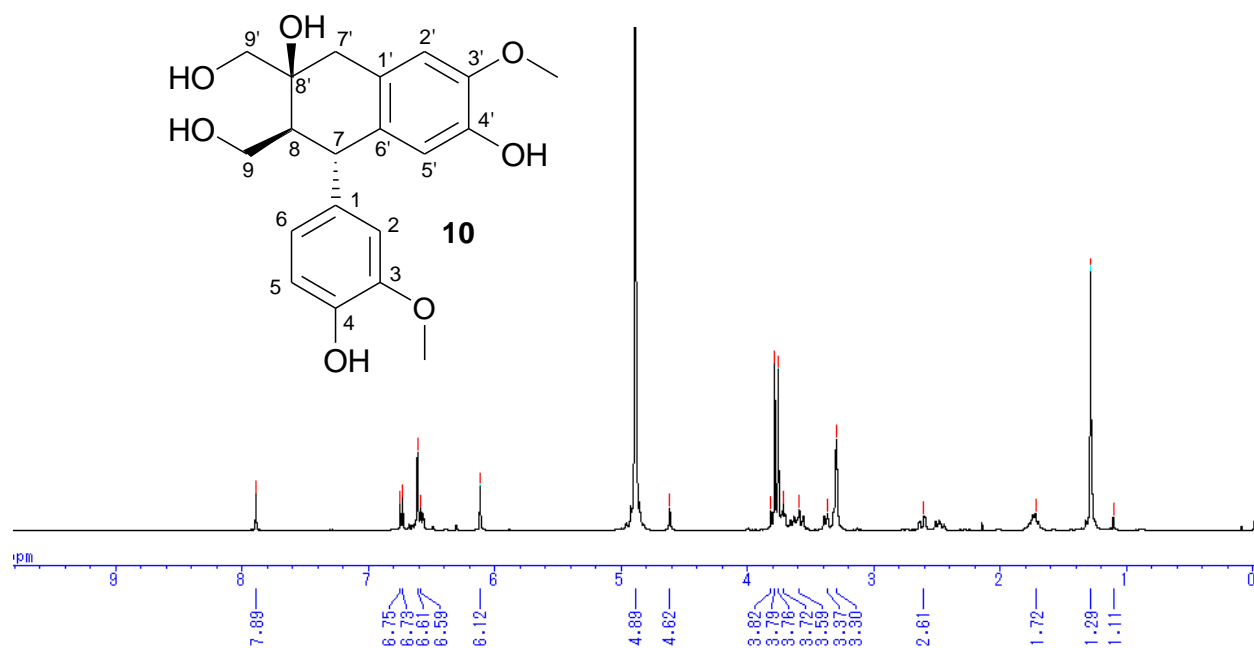

Figure S 10b.  $^{13}\text{C}$  NMR spectrum of **10** (Methanol- $d_4$ , 100 MHz) (+)-Cyclooolivil

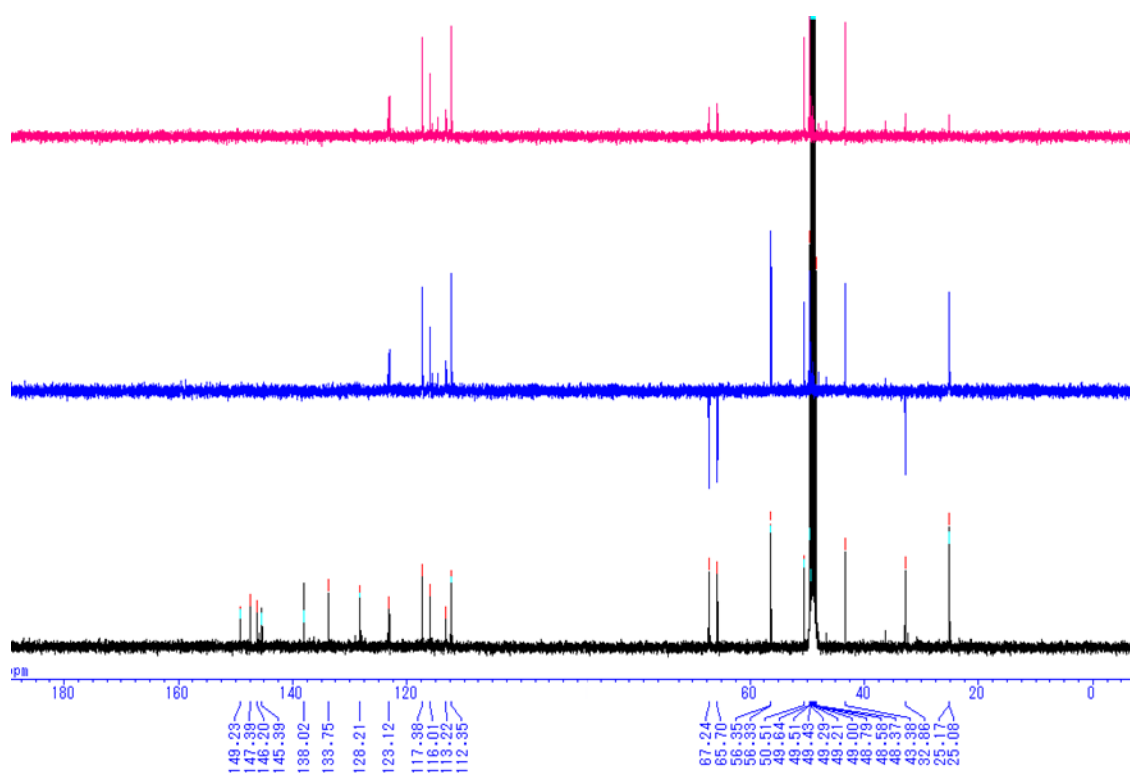

Figure S 11a.  $^1\text{H}$  NMR spectrum of **11** (Methanol- $d_4$ , 400 MHz) (+)-Secoisolariciresinol

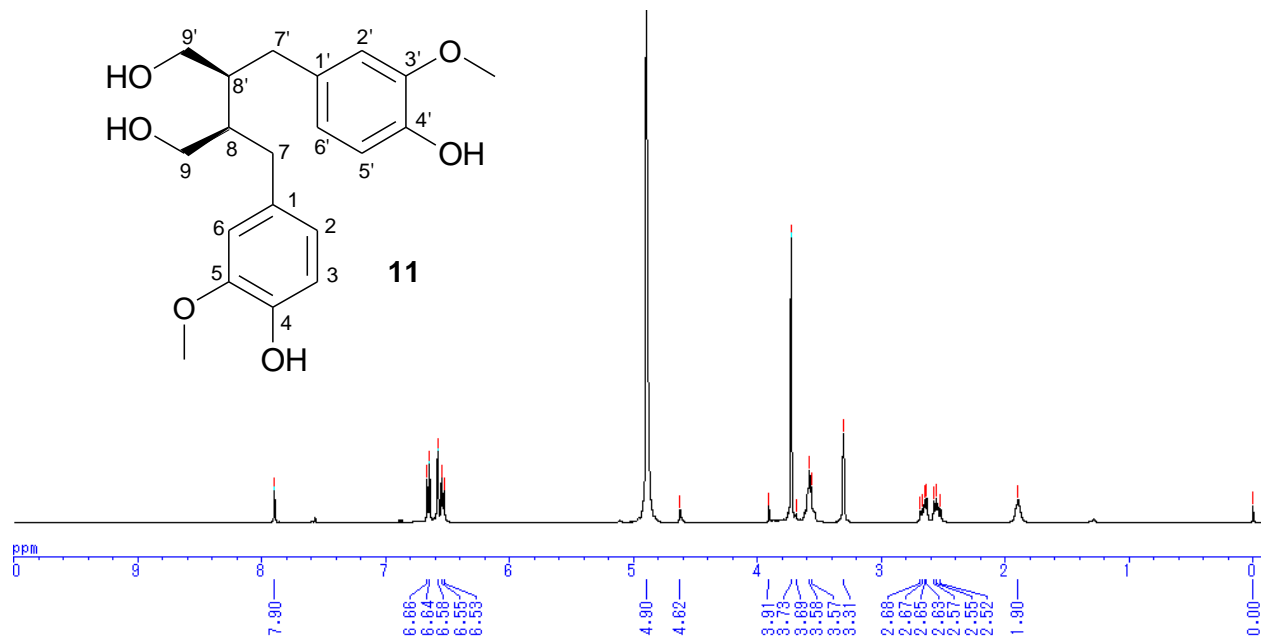

Figure S 11b.  $^{13}\text{C}$  NMR spectrum of **11** (Methanol- $d_4$ , 100 MHz) (+)-Secoisolariciresinol

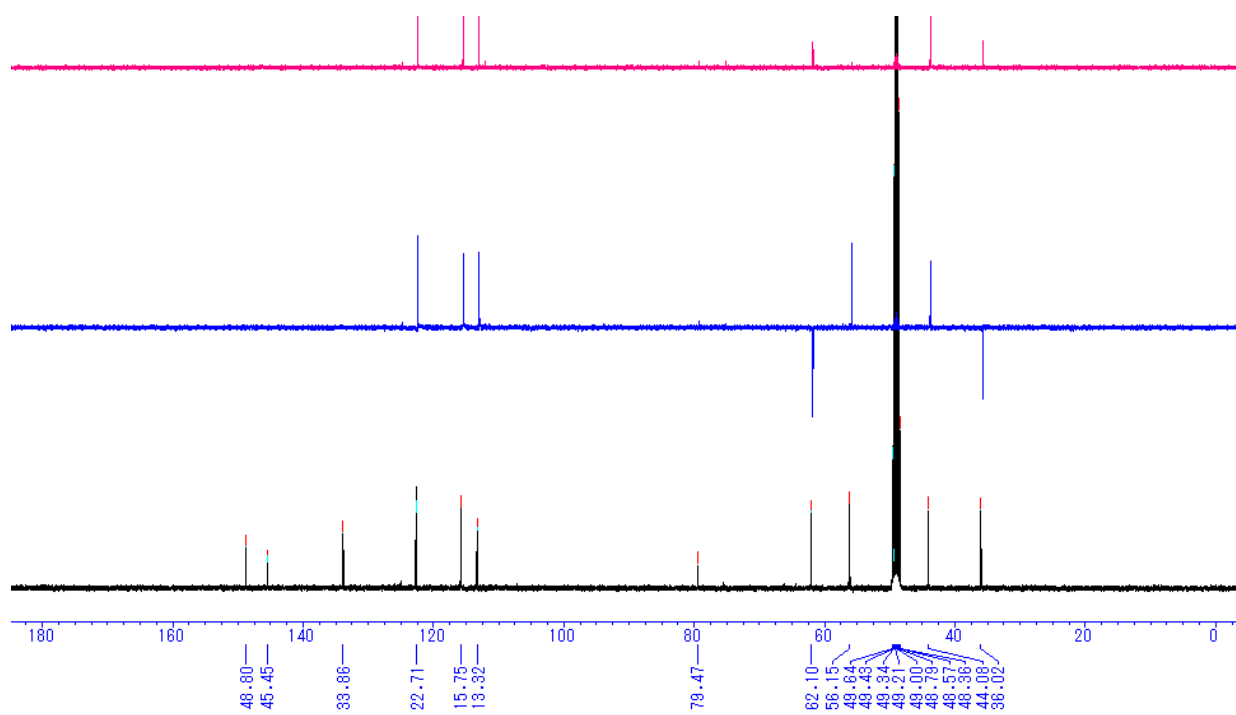

Figure S 12a.  $^1\text{H}$  NMR spectrum of **12** (Methanol- $d_4$ , 400 MHz) (+)-Isolariciresinol

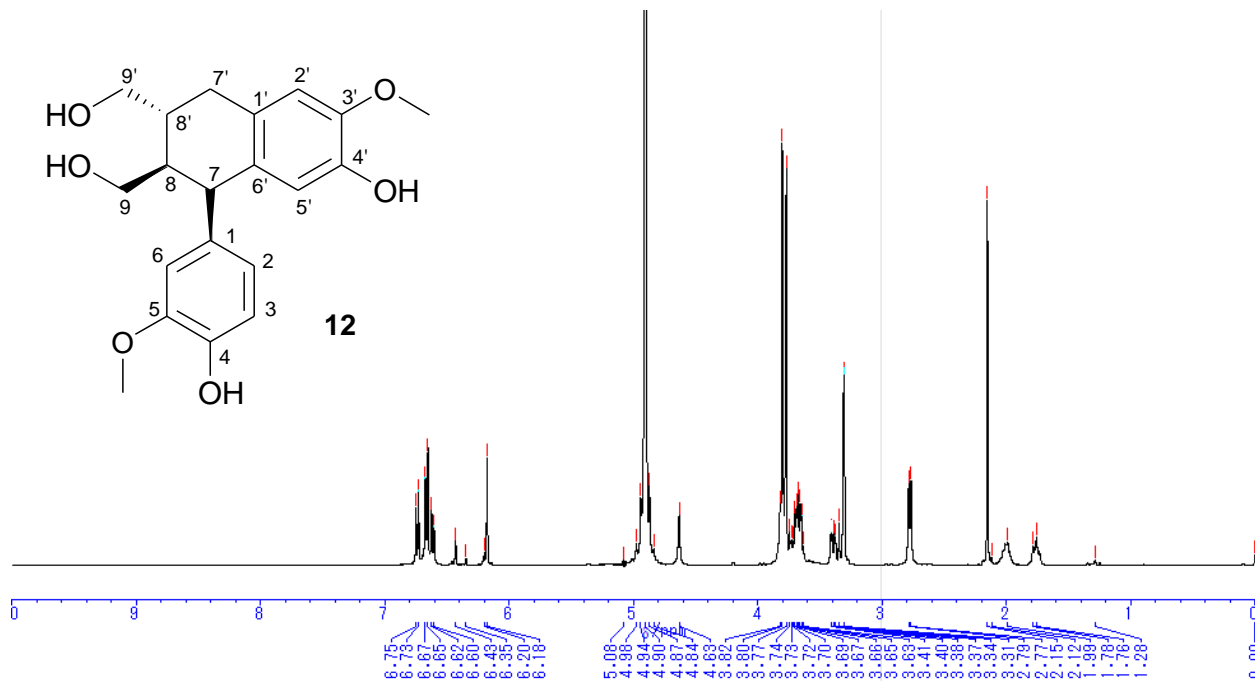

Figure S 12b.  $^{13}\text{C}$  NMR spectrum of **12** (Methanol- $d_4$ , 100 MHz) (+)-Isolariciresinol

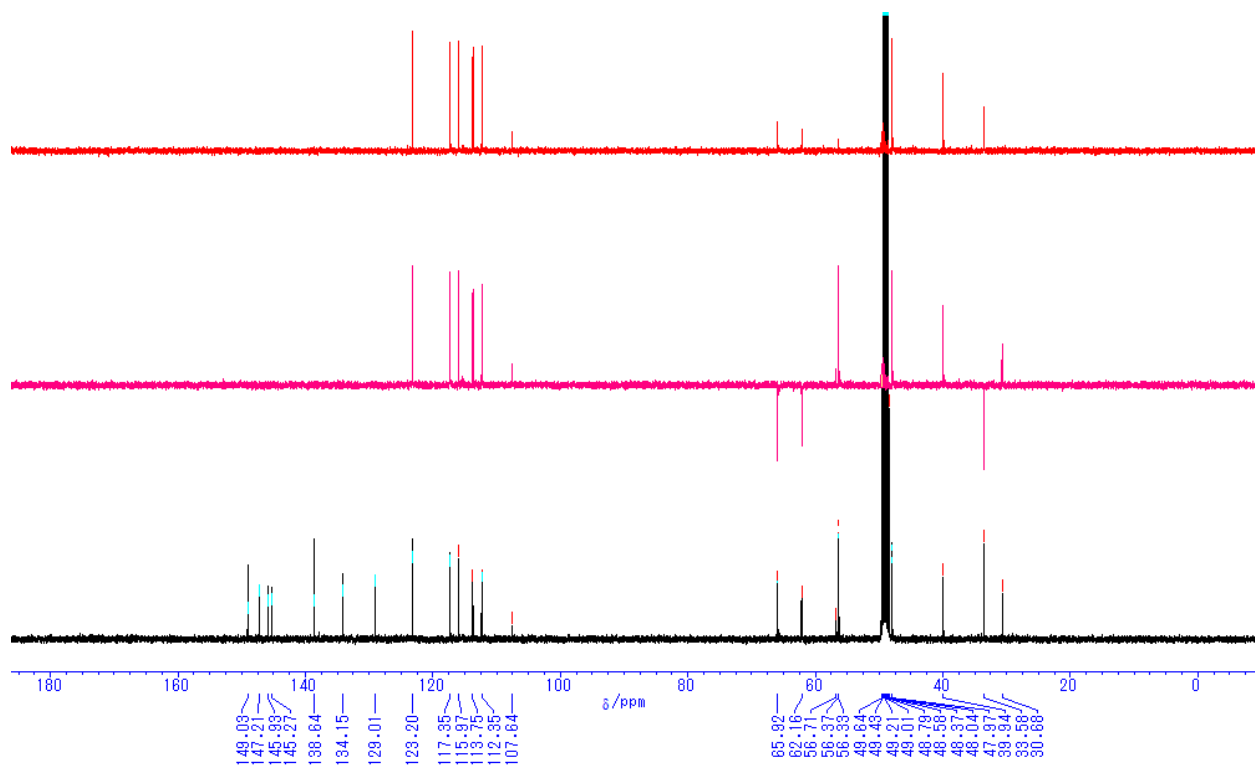

Figure S 13a.  $^1\text{H}$  NMR spectrum of **13** (Methanol- $d_4$ , 400 MHz) (+)-Eriodictyol

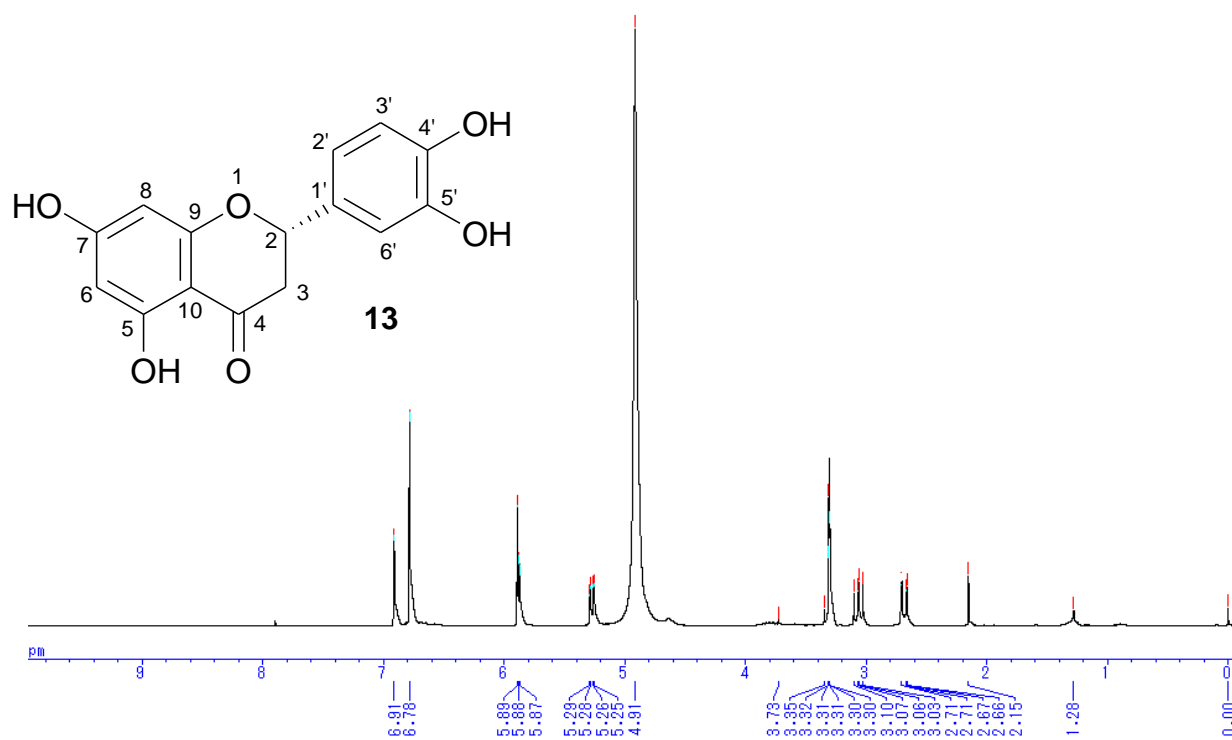

Figure S 13b.  $^{13}\text{C}$  NMR spectrum of **13** (Methanol- $d_4$ , 100 MHz) (+)-Eriodictyol

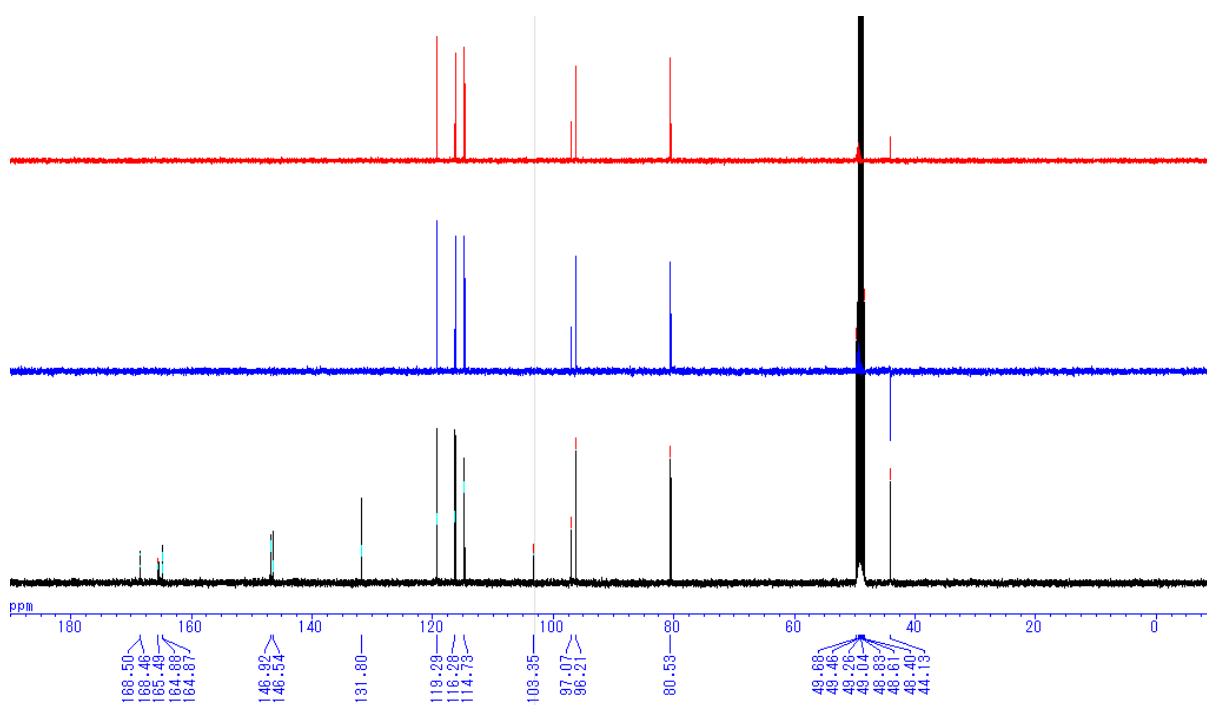



Figure S 14a.  $^1\text{H}$  NMR spectrum of **TSS-1** (Chloroform-*d*, 300 MHz) TSS-1

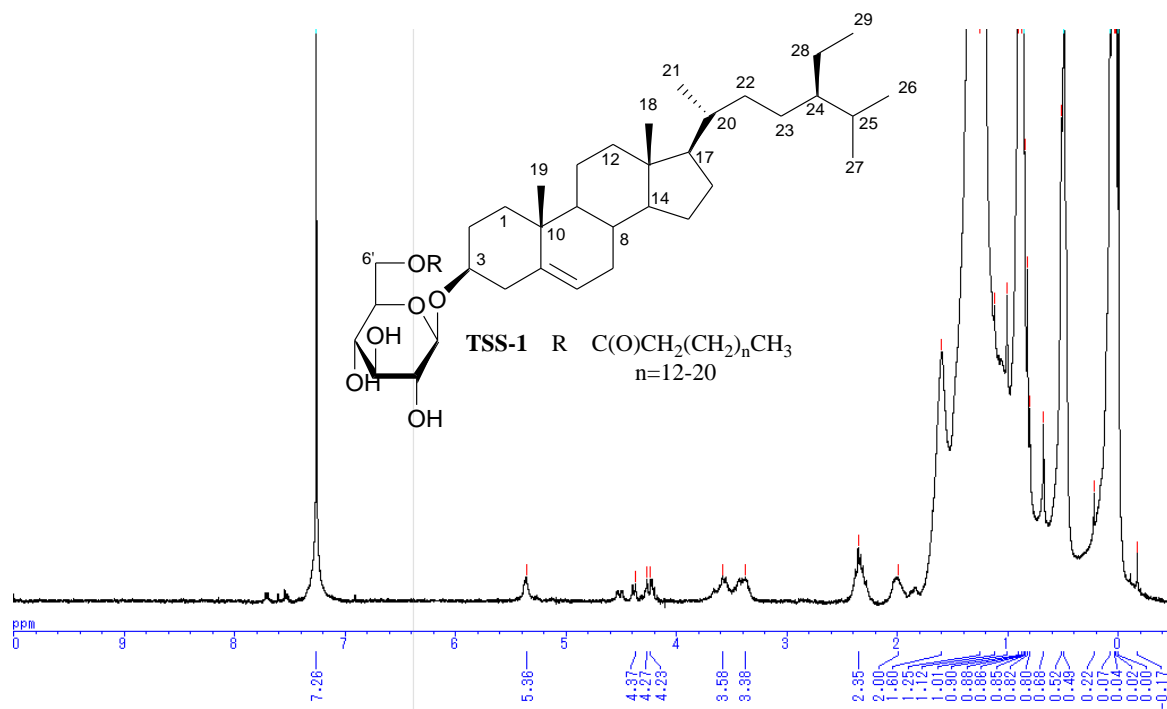

Figure S 14b.  $^{13}\text{C}$  NMR spectrum of **TSS-1** (Chloroform-*d*, 100 MHz) TSS-1

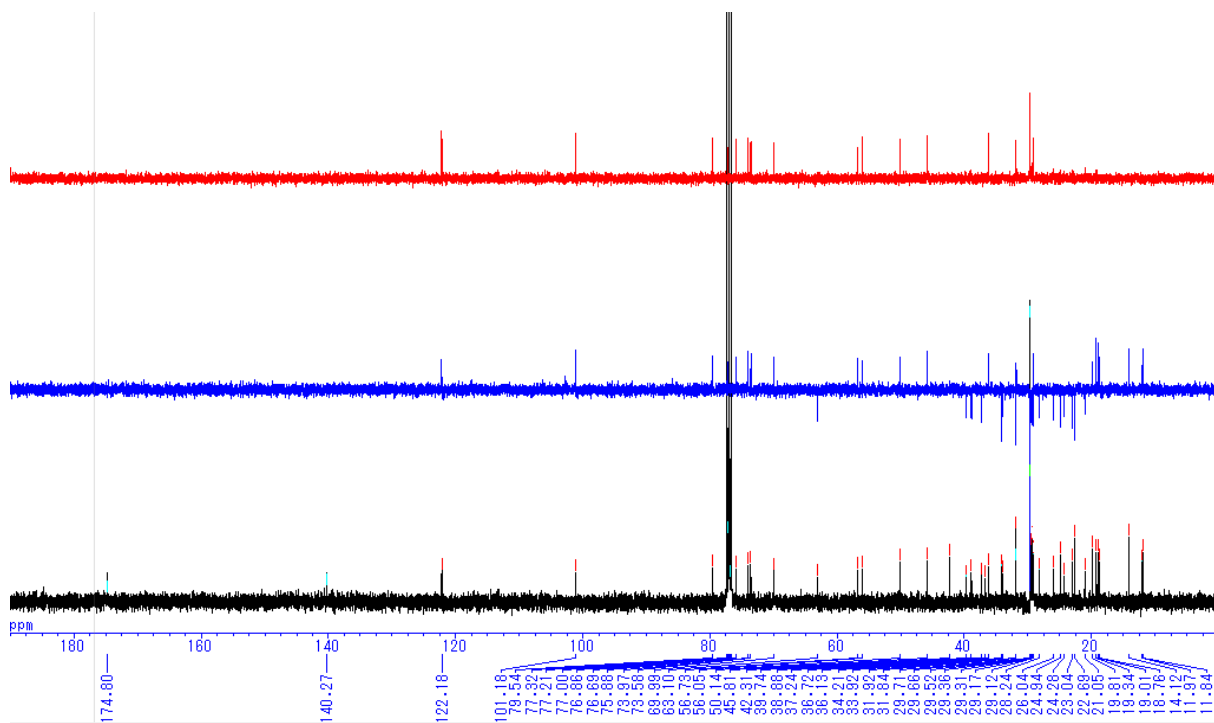

Figure S 15a.  $^1\text{H}$  NMR spectrum of TSC-1 (Pyridine- $d_5$ , 300 MHz)

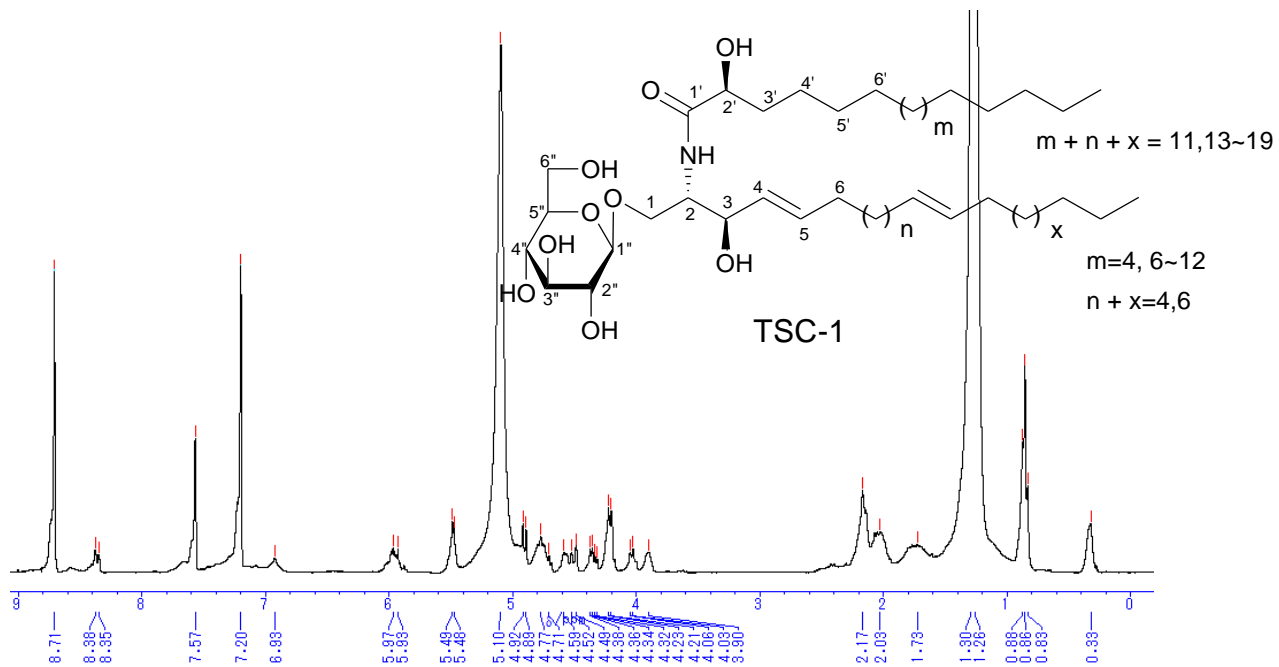

Figure S 15b.  $^{13}\text{C}$  NMR spectrum of TSC-1 (Pyridine- $d_5$ , 100 MHz)

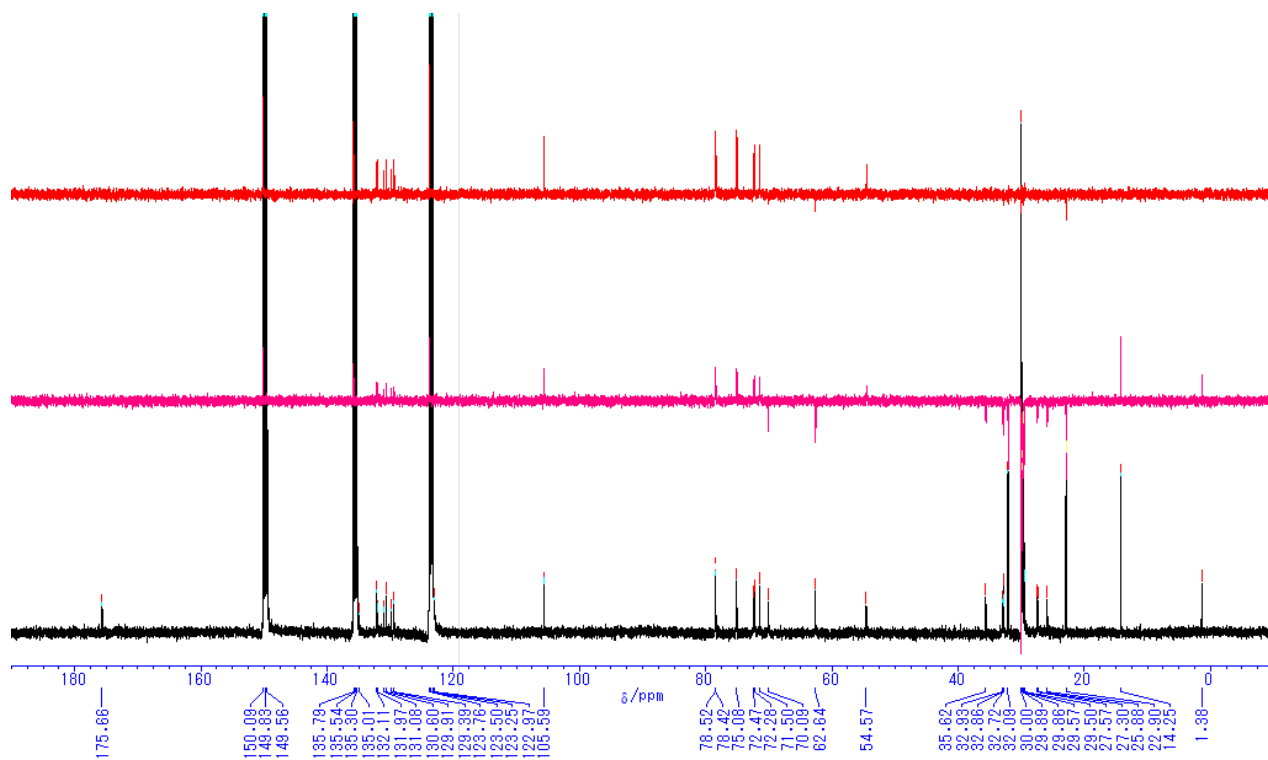

Figure S 16a.  $^1\text{H}$  NMR spectrum of TSC-2 (Pyridine- $d_5$ , 300 MHz)

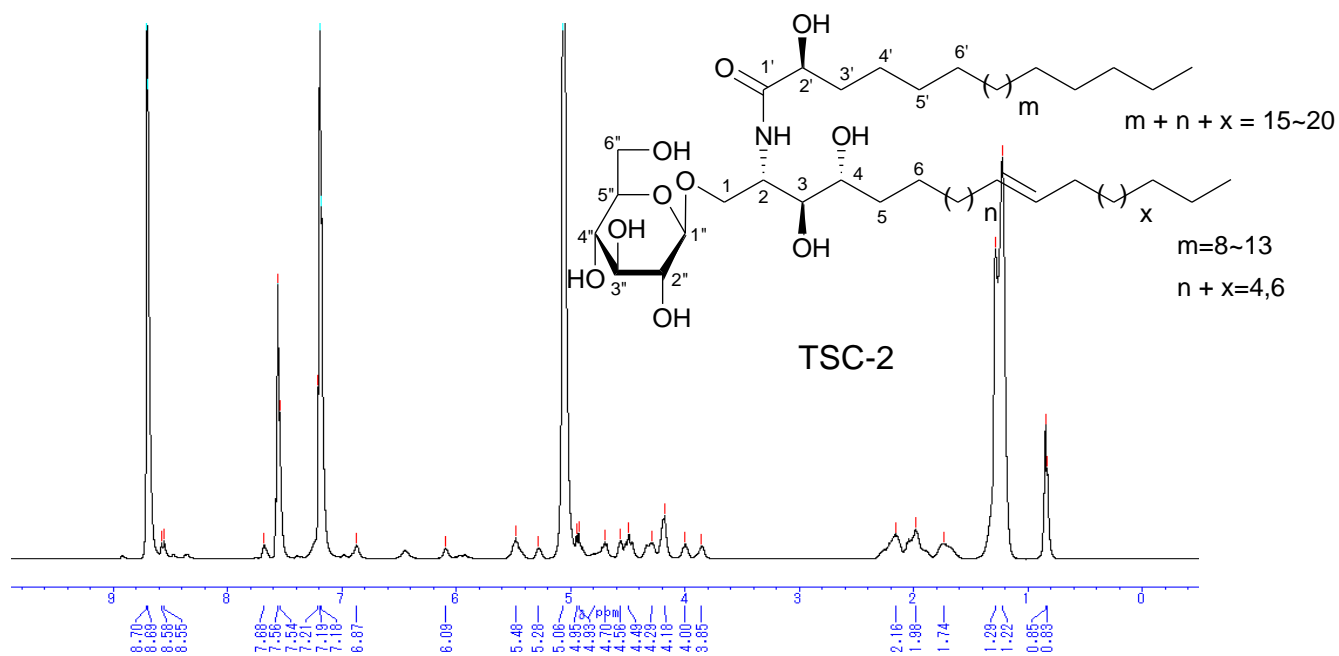

Figure S 16b.  $^{13}\text{C}$  NMR spectrum of TSC-2 (Pyridine- $d_5$ , 100 MHz)

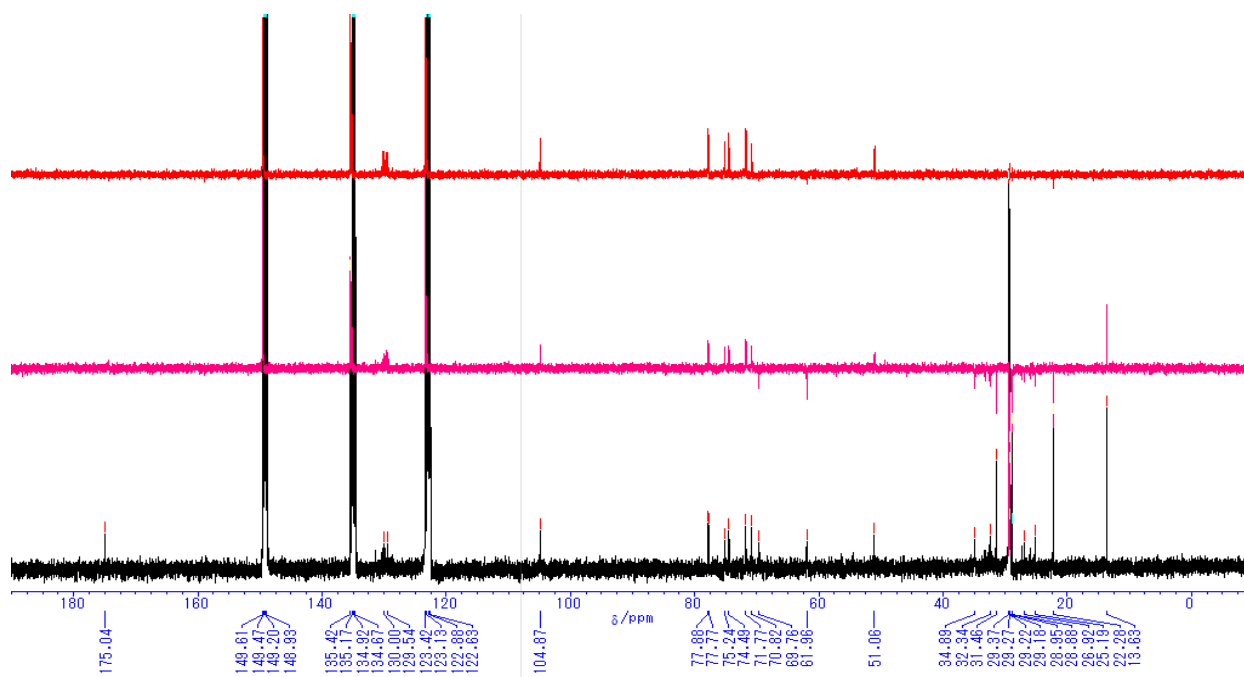

Figure S 17.  $^1\text{H}$  NMR spectrum of **TSC-1-FAME** (Chloroform- $d$ , 300 MHz)

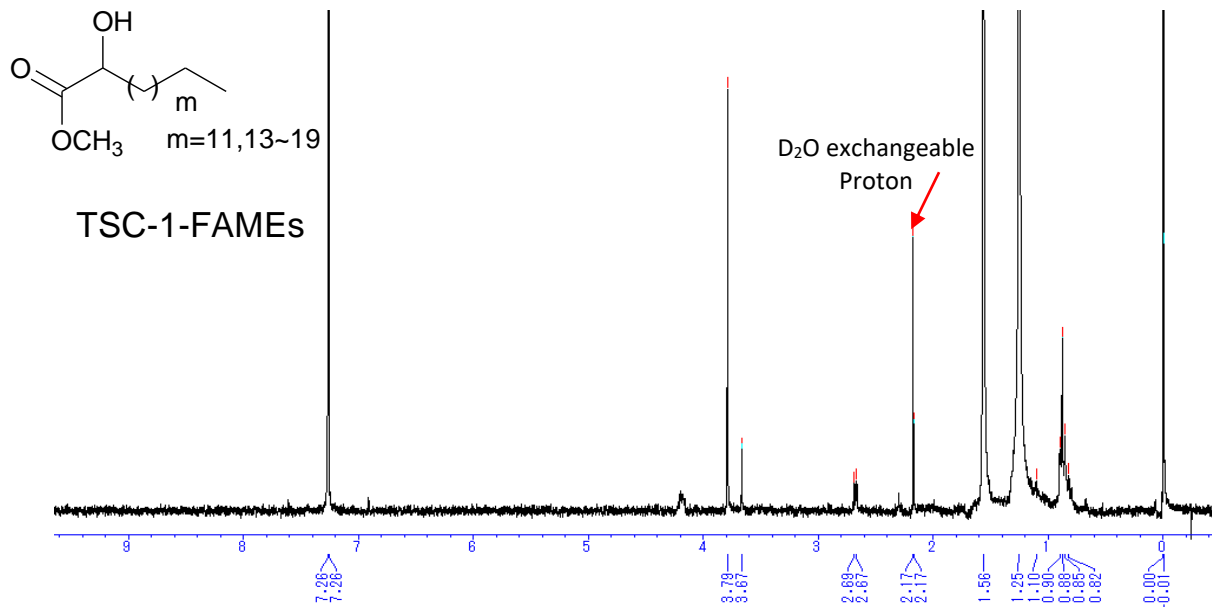

Figure S 18.  $^1\text{H}$  NMR spectrum of **TSC-2-FAME** (Chloroform- $d$ , 300 MHz)

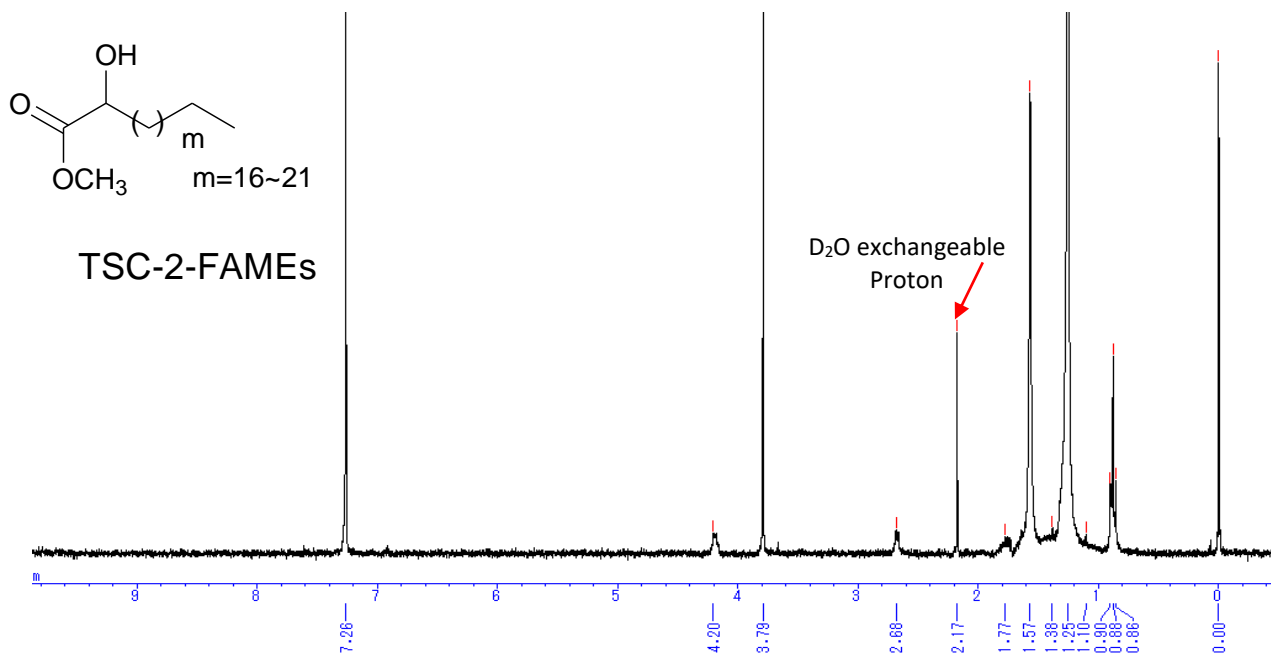

Figure S 19.  $^1\text{H}$  NMR spectrum of **TSC-1-FAME** (Chloroform- $d$ + $\text{D}_2\text{O}$ , 300 MHz)

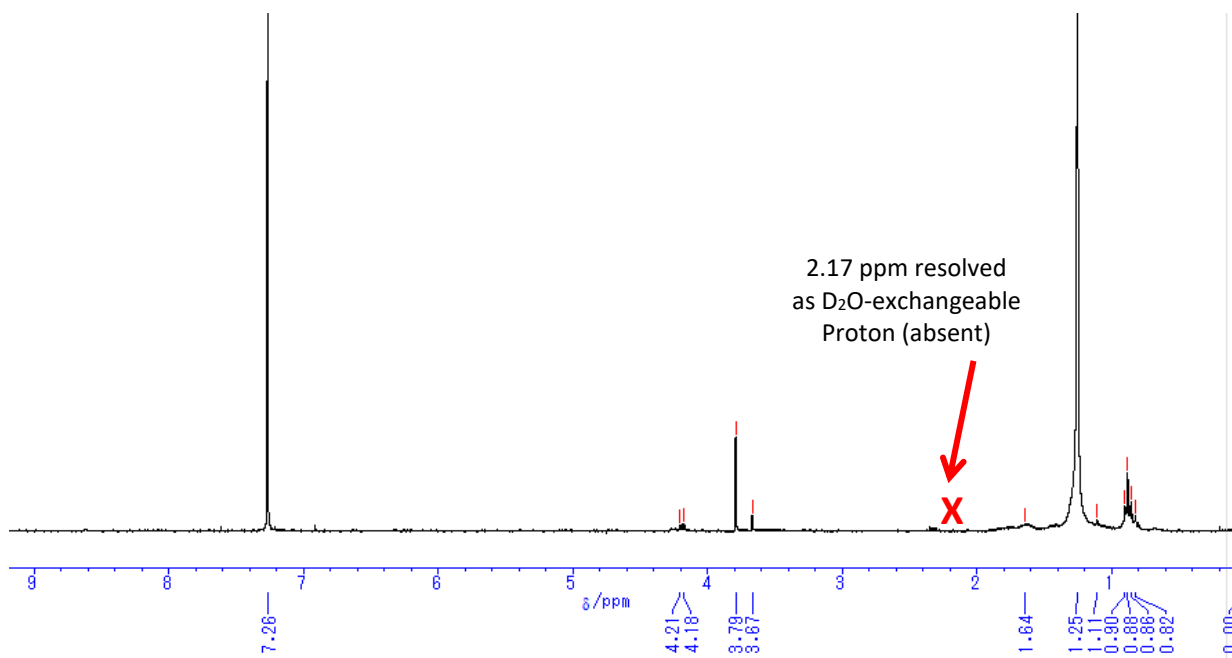

Figure S 20. FAB MASS data of **TSS-1**

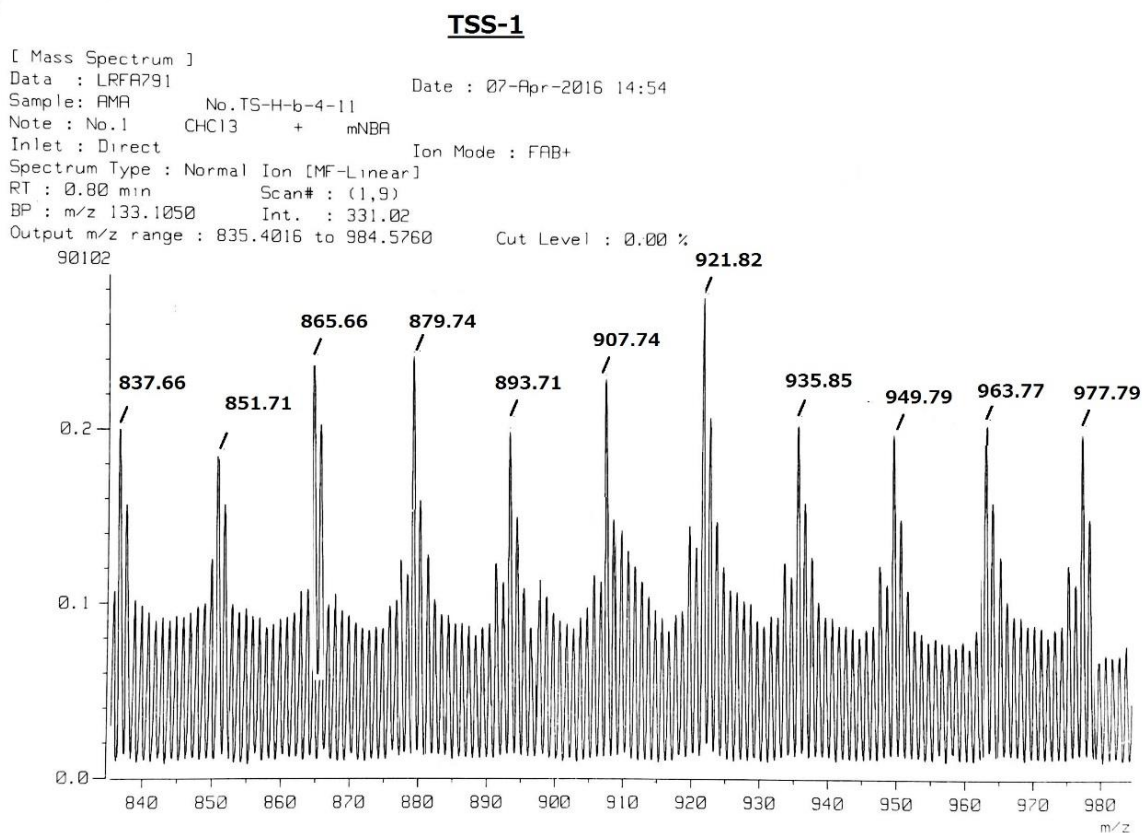

Figure S 21. FAB MASS data of TSC-1

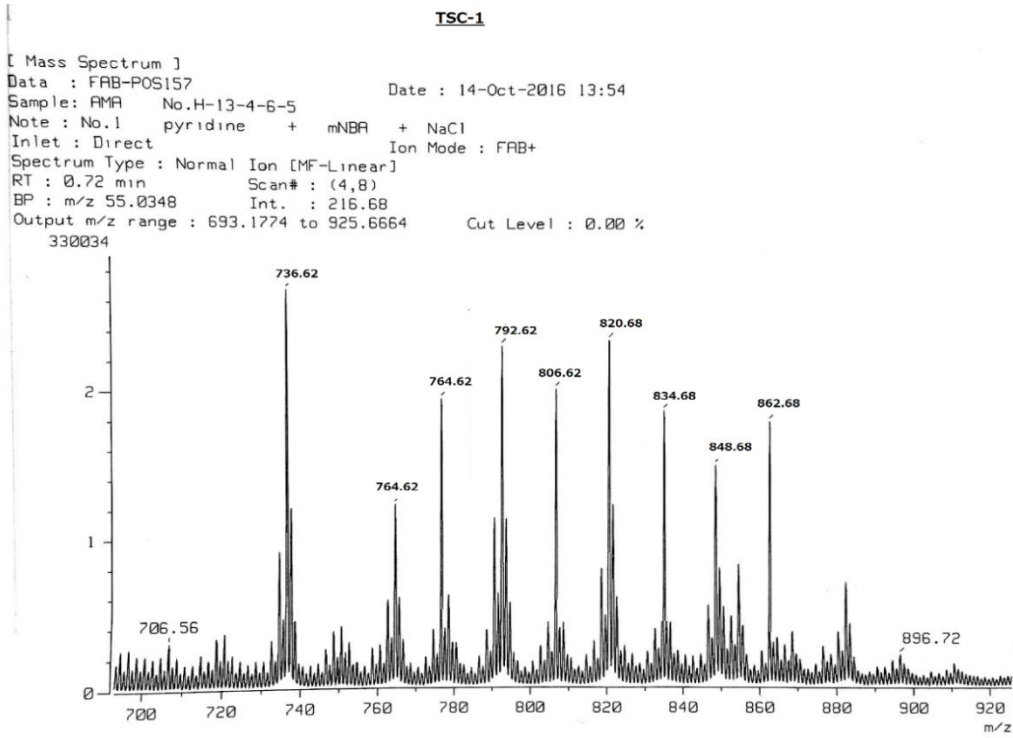

Figure S 22. FAB MASS data of TSC-2

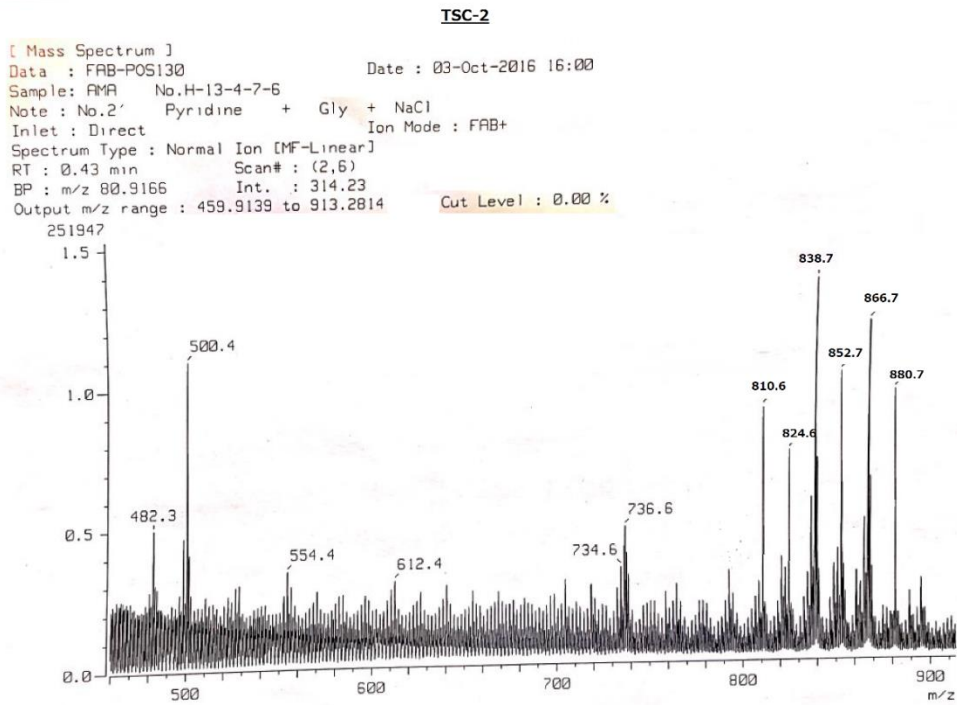

Figure S 23. FAB MASS data of TSC-1-FAME

TSC-1-FAME

[ Mass Spectrum ]  
Data : FAB-POS-452 Date : 17-Mar-2017 11:32  
Sample : AMA No.TSC-1-FAME  
Note : No.1 CHCl3 + mNBA  
Inlet : Direct Ion Mode : FAB+  
RT : 0.00 min Scan# : (1,7)  
BP : m/z 55.1719  
Cut Level : 0.00 %

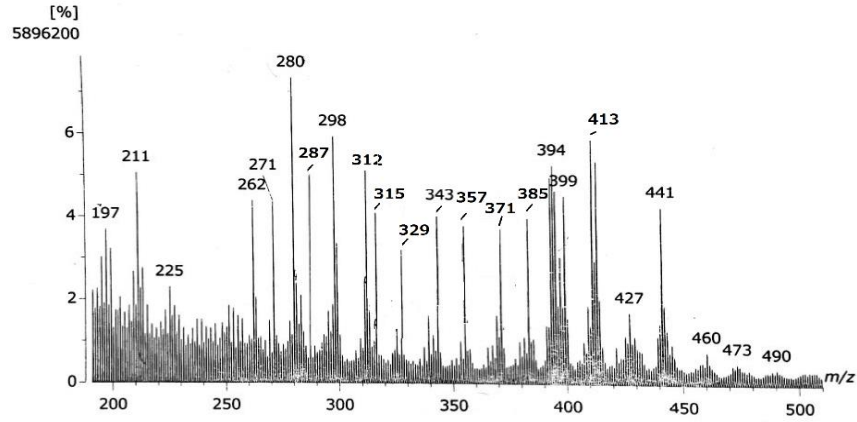

Figure S 24. FAB MASS data of TSC-2-FAME

TSC-2-FAME

[ Mass Spectrum ]  
Data : FAB-POS-456 Date : 17-Mar-2017 11:58  
Sample : AMA No.TSC-2-FAME  
Note : No.1 CHCl3 + mNBA  
Inlet : Direct Ion Mode : FAB+  
RT : 0.00 min Scan# : (1,7)  
BP : m/z 55.1719  
Cut Level : 0.00 %

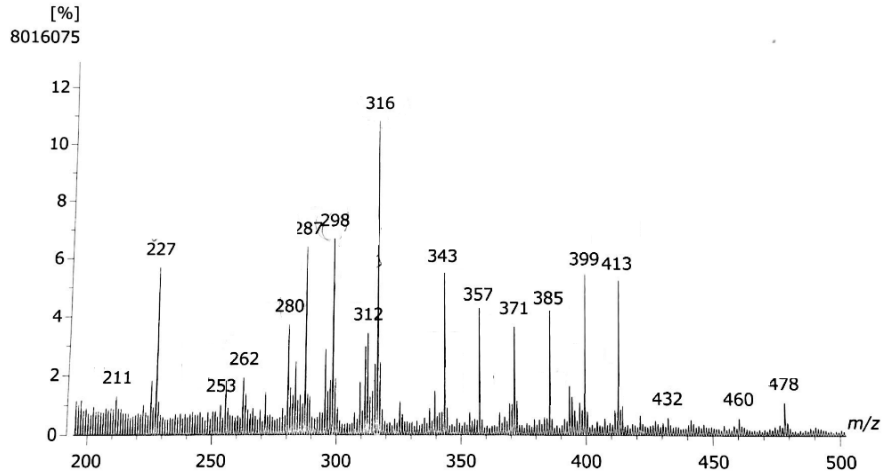

Figure S 25. FAB MASS data of TSC-1-LCB-1

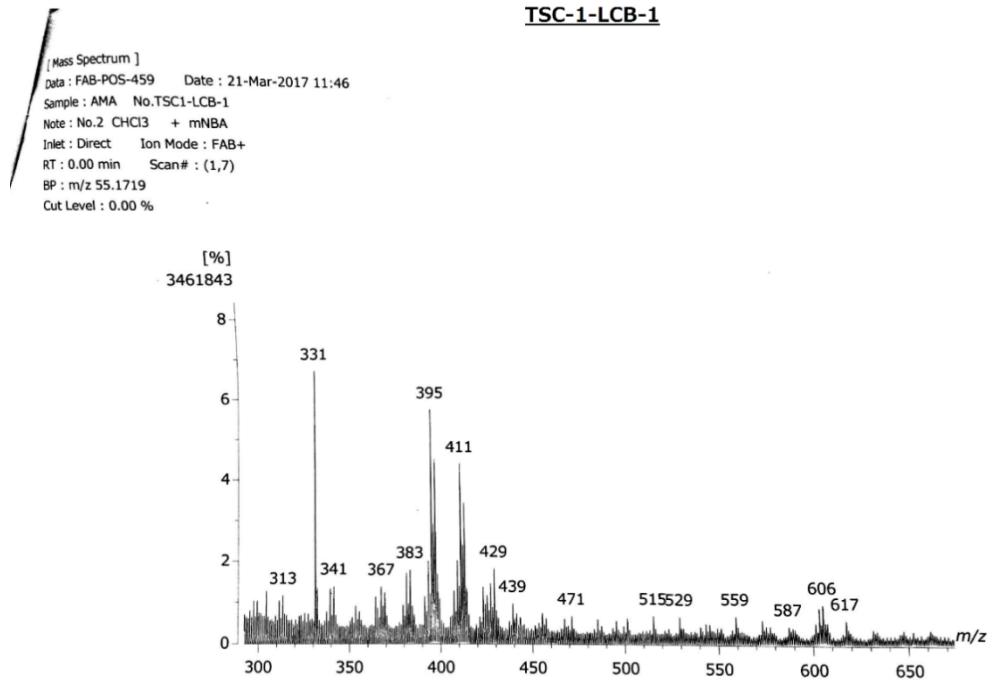

Figure S 26. FAB MASS data of TSC-1-LCB-2

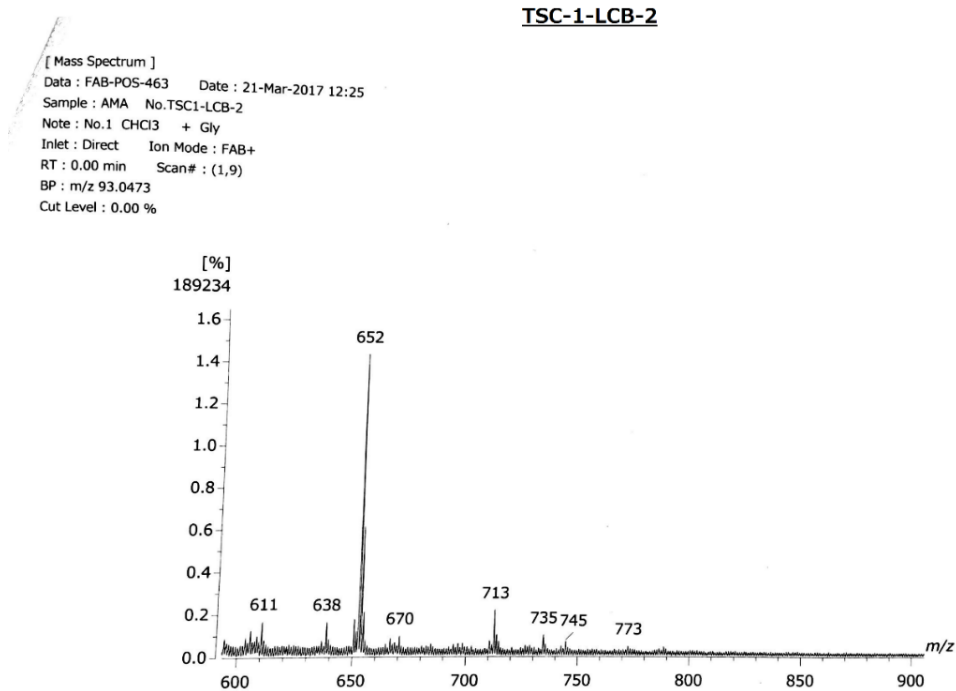



Figure S 27. FAB MASS data of TSC-2-LCB-1

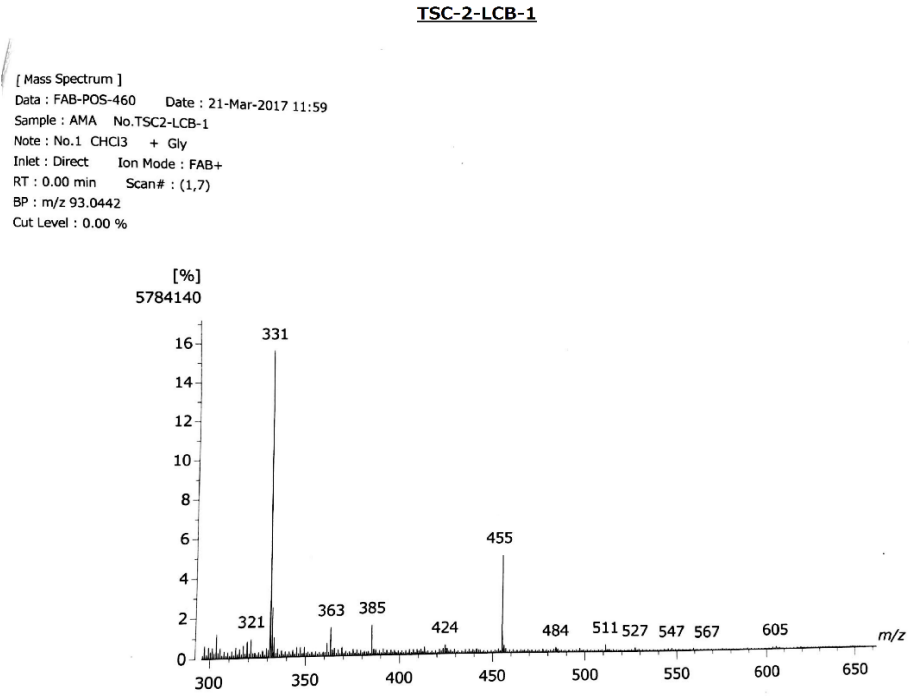

Figure S 28. FAB MASS data of TSC-2-LCB-2

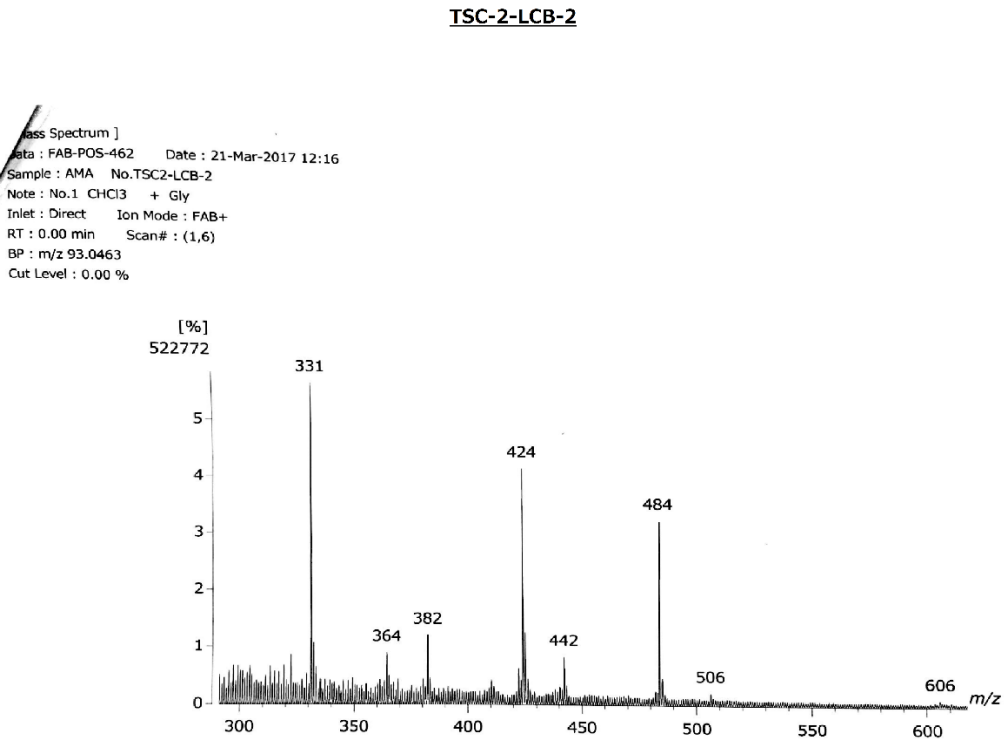

Supplement: c8ra03913e1.pdf [file c8ra03913e1.pdf]
